# Supplementary material for: Early Chronic Kidney Disease Care Programme delays kidney function deterioration in patients with stage I–IIIa chronic kidney disease: an observational cohort study in Taiwan
Source: PubMed Central journal article supplement — BMJ Open. 2021 Jan 19;11(1):e041210. doi: 10.1136/bmjopen-2020-041210 (PMC7817788; doi:10.1136/bmjopen-2020-041210), 2021-01-19
Supplement: bmjopen-2020-041210.draft_revisions.pdf [file bmjopen-2020-041210.draft_revisions.pdf]

# BMJ Open

BMJ Open is committed to open peer review. As part of this commitment we make the peer review history of every article we publish publicly available.

When an article is published we post the peer reviewers' comments and the authors' responses online. We also post the versions of the paper that were used during peer review. These are the versions that the peer review comments apply to.

The versions of the paper that follow are the versions that were submitted during the peer review process. They are not the versions of record or the final published versions. They should not be cited or distributed as the published version of this manuscript.

BMJ Open is an open access journal and the full, final, typeset and author-corrected version of record of the manuscript is available on our site with no access controls, subscription charges or pay-per-view fees (<http://bmjopen.bmj.com>).

If you have any questions on BMJ Open's open peer review process please email [info.bmjopen@bmj.com](mailto:info.bmjopen@bmj.com)

# BMJ Open

## Effect of Early Chronic Kidney Disease Care Program on Kidney Function Deterioration in Patients With Stage I–IIIa Chronic Kidney Disease

|                               |                                                                                                                                                                                                                                                                                                                                                                                                                                                                            |
|-------------------------------|----------------------------------------------------------------------------------------------------------------------------------------------------------------------------------------------------------------------------------------------------------------------------------------------------------------------------------------------------------------------------------------------------------------------------------------------------------------------------|
| Journal:                      | <i>BMJ Open</i>                                                                                                                                                                                                                                                                                                                                                                                                                                                            |
| Manuscript ID                 | bmjopen-2020-041210                                                                                                                                                                                                                                                                                                                                                                                                                                                        |
| Article Type:                 | Original research                                                                                                                                                                                                                                                                                                                                                                                                                                                          |
| Date Submitted by the Author: | 06-Jun-2020                                                                                                                                                                                                                                                                                                                                                                                                                                                                |
| Complete List of Authors:     | Niu, Shu-Fen; Shin Kong Wu Ho Su Memorial Hospital, Department of Nursing<br>Wu, Chung-Kuan; Shin-Kong Wu Ho-Su Memorial Hospital, Division of Nephrology, Department of Internal Medicine<br>Chuang, Nai-Chen; Taipei Medical University, Clinical Data Center, Office of Data Science<br>Yang, Ya-Bei; Shin Kong Wu Ho Su Memorial Hospital, Division of Cardiovascular Surgery<br>Chang, Tzu-Hao; Taipei Medical University Hospital, Clinical Big Data Research Center |
| Keywords:                     | Chronic renal failure < NEPHROLOGY, Nephrology < INTERNAL MEDICINE, Health policy < HEALTH SERVICES ADMINISTRATION & MANAGEMENT                                                                                                                                                                                                                                                                                                                                            |
|                               |                                                                                                                                                                                                                                                                                                                                                                                                                                                                            |

SCHOLARONE™  
Manuscripts

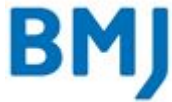

I, the Submitting Author has the right to grant and does grant on behalf of all authors of the Work (as defined in the below author licence), an exclusive licence and/or a non-exclusive licence for contributions from authors who are: i) UK Crown employees; ii) where BMJ has agreed a CC-BY licence shall apply, and/or iii) in accordance with the terms applicable for US Federal Government officers or employees acting as part of their official duties; on a worldwide, perpetual, irrevocable, royalty-free basis to BMJ Publishing Group Ltd ("BMJ") its licensees and where the relevant Journal is co-owned by BMJ to the co-owners of the Journal, to publish the Work in this journal and any other BMJ products and to exploit all rights, as set out in our [licence](#).

The Submitting Author accepts and understands that any supply made under these terms is made by BMJ to the Submitting Author unless you are acting as an employee on behalf of your employer or a postgraduate student of an affiliated institution which is paying any applicable article publishing charge ("APC") for Open Access articles. Where the Submitting Author wishes to make the Work available on an Open Access basis (and intends to pay the relevant APC), the terms of reuse of such Open Access shall be governed by a Creative Commons licence – details of these licences and which [Creative Commons](#) licence will apply to this Work are set out in our licence referred to above.

Other than as permitted in any relevant BMJ Author's Self Archiving Policies, I confirm this Work has not been accepted for publication elsewhere, is not being considered for publication elsewhere and does not duplicate material already published. I confirm all authors consent to publication of this Work and authorise the granting of this licence.

## Effect of Early Chronic Kidney Disease Care Program on Kidney Function

### Deterioration in Patients With Stage I–IIIa Chronic Kidney Disease

Shu-Fen Niu<sup>1,2,3</sup>, Chung-Kuan Wu<sup>4,5</sup>, Nai-Chen Chuang<sup>6</sup>, Ya-Bei Yang<sup>7</sup>, Tzu-Hao Chang<sup>8,9</sup>

#### Reprints and correspondence:

Address to Chung-Kuan Wu, MD, PhD

Division of Nephrology, Department of Internal Medicine, Shin-Kong Wu Ho-Su

Memorial Hospital, Taipei, Taiwan

No.95, Wenchang Rd., Shilin Dist., Taipei City 11101, Taiwan

Tel: +886-2-2833-2211 ext. 2385 Fax: +886-28389491

E-mail: [m008533@ms.skh.org.tw](mailto:m008533@ms.skh.org.tw)

Or

Tzu-Hao Chang, PhD

Clinical Big Data Research Center, Taipei Medical University Hospital, Taipei,

Taiwan

No.250, Wu-Hsing st., Xinyi Dist., Taipei City 11031, Taiwan

Tel: 886-2-6638-2736 #1508 Fax: +886-2-66380233

E-mail: [kevinchang@tmu.edu.tw](mailto:kevinchang@tmu.edu.tw)

## ABSTRACT

**Objectives:** To investigate the effect of the Early CKD Care Program on CKD

progression in patients with CKD stage I–IIIa

**Design:** Observational cohort study

**Setting:** The institutional and clinical research database of Taipei Medical University

from three affiliated hospitals.

**Participants:** Adult nonpregnant patients with CKD stage I–IIIa from the institutional

and clinical research database of Taipei Medical University between January 1, 2012

and August 31, 2017 were recruited. These patients were divided into Early CKD

Care Program participants (case) and nonparticipants (control). 1:2 propensity score

matching for age, sex, estimated glomerular filtration rate, and CKD stage was

performed to reduce bias between two groups.

**Outcome measures:** The risks of CKD stage I–IIIa progression to IIIb between Early

CKD Care Program participants and nonparticipants.

**Results:** Compared with the control group, the case group demonstrated more

comorbidities and higher proportions of hypertension, diabetes mellitus, gout,

dyslipidemia, heart disease, and cerebrovascular disease, but had lower risk of

progression to CKD stage IIIb before and (HR, 0.72; 95% CI, 0.61–0.85) and after

(aHR, 0.67; 95% CI, 0.55–0.81) adjustments. Moreover, Kaplan–Meier analysis

1  
2  
3  
4 revealed the cumulative incidence of CKD stage IIIb was significantly lower in the  
5  
6  
7 case group than in the control group. Finally, the program was an independent  
8  
9  
10 protective factor against progression to stage IIIb, especially in patients with CKD  
11  
12  
13 stage IIIa before (HR, 0.72; 95% CI, 0.61–0.85) and after (aHR, 0.67; 95% CI, 0.55–  
14  
15  
16 0.81) adjustments.

17  
18  
19 **Conclusions:** The Early CKD Care Program is an independent protective factor  
20  
21  
22 against progression of early CKD.  
23  
24  
25  
26  
27

### 28 **Strengths and limitations of this study**

- 29  
30  
31 ● The study provides the information on the preventive effect of the Early CKD  
32  
33  
34 Care Program on CKD progression
- 35  
36  
37 ● The patients in our study were recruited from the greater Taipei area, which  
38  
39  
40 might not be representative of all clinical situations in Taiwan because of the  
41  
42  
43 urban–rural medical disparity
- 44  
45  
46 ● Selection bias should be considered for participants owing to their motivation  
47  
48  
49 and role of medical personnel
- 50  
51  
52 ● The clinical outcome focus on the progression of early CKD, rather than major  
53  
54  
55 adverse cardiac events or mortality  
56  
57  
58  
59  
60

## Introduction

Chronic kidney disease (CKD) is recognized as a global health concern<sup>1</sup> because its overall prevalence in the general population is more than 10%. CKD prevalence ranged from 11.7% to 15.1%, with stages I-V accounting for 2.8%–4.2%, 2.7%–5.3%, 6.4%–8.9%, 0.3%–0.5%, and 0.1%, respectively. Therefore, most patients with CKD are in the early stages,<sup>2</sup> in which they may have no symptoms or signs.<sup>3</sup> Such early disease stages are not easily discovered and diagnosed by primary care physicians; therefore, most patients had not consulted a nephrologist, with fewer than 6% of the patients had consulting a nephrologist even for stage III CKD.<sup>4</sup> Without appropriate response or management of early CKD, it progresses to advanced CKD and finally to end-stage renal disease (ESRD), which usually requires management with dialysis. Therefore, exponential growth in medical costs<sup>5</sup> is expected. Despite treatment, patients with ESRD have poor quality of life and high mortality risk.<sup>6</sup>

In CKD stages I-II, an optimal outcome can be achieved with adequate assessment, diagnosis, and treatment.<sup>4</sup> The US Centers for Disease Control and Prevention recommends that early CKD progression prevention should include testing for and controlling CKD risk factors as well as maintaining a healthy weight through a balanced diet and physical exercise.<sup>7</sup> Moreover, early monitoring and treatment in conjunction with lifestyle adjustments can improve the revisit rate of patients with

1  
2  
3  
4 CKD and delay renal function reduction.<sup>8</sup>  
5  
6

7 In Taiwan, more than 85,000 patients require dialysis and the related National  
8  
9  
10 Health Insurance (NHI) expenditure reached NT\$44.9 billion in 2017. To reduce  
11  
12  
13 kidney function deterioration, improve the quality of life, reduce the burden on the  
14  
15  
16 NHI program, and achieve the goal of prioritizing prevention over management,  
17  
18  
19 Taiwan's Ministry of Health and Welfare launched the Early CKD Care Program  
20  
21  
22 aimed at active management of stage I–IIIa CKD.<sup>9,10</sup> However, the effectiveness of  
23  
24  
25 intervention in delaying kidney function deterioration warrants exploration.  
26  
27

28 Therefore, this study explored the effects of an intervention-based Early CKD Care  
29  
30  
31 Program in reducing kidney function deterioration in patients with stage I–IIIa CKD.  
32  
33

## 34 **Materials and Methods**

### 35 **Data Source.**

36  
37  
38 This cohort study obtained information on patients with CKD stages I–IIIa in the  
39  
40  
41 institutional and clinical research database of Taipei Medical University (CRDB).  
42  
43  
44

45  
46 This database contains the electronic health and medical records of more than 3  
47  
48  
49 million patients from three affiliated hospitals, namely Taipei Medical University  
50  
51  
52 Hospital (TMUH), Wan Fang Hospital (WFH), and Shuang Ho Hospital (SHH). This  
53  
54  
55 study was exempted from a full review and approved by the Institutional Review  
56  
57  
58 Board of Taipei Medical University (TMU-JIRB-201803022).  
59  
60



### **Study Design and Cohort.**

Figure 1 illustrates the patient selection process for the study cohort. From the CRDB, we identified patients with CKD who had more than two medical return visits between January 1, 2012, and August 31, 2017. We enrolled those who met the following criteria of CKD stages I-IIIa: patients with normal renal function but who present signs of kidney damage such as proteinuria, hematuria, and other conditions with eGFR  $\geq 90$  mL/min/1.73 m<sup>2</sup>; patients with kidney damage with eGFR 60–89.9 mL/min/1.73 m<sup>2</sup>; and patients with eGFR 45–59.9 mL/min/1.73 m<sup>2</sup>, respectively. We excluded patients aged < 18 years and those who were pregnant. The remaining patients were divided into the case group, those who participated in the Early CKD Care Program with P4301C, P4302C, or P403603C treatment codes, and the control group, consisting of those who did not participate in the Early CKD Care Program.

### **Outcome Measures and Comorbidity.**

Major comorbidities diagnosed before the index date, according to claims data, were defined as baseline comorbidities. The comorbidities were identified using the International Classification of Diseases, Ninth Revision, Clinical Modification (ICD-9-CM) codes for hypertension, DM, gout, hyperlipidemia, heart disease, and cerebrovascular disease, as shown in Supplementary Table S1. Other baseline demographic data included age, sex, eGFR, CKD stage, and number of comorbidities.

1  
2  
3  
4 Here, the eGFR was calculated as  $186 \times \text{creatinine}^{-1.154} \times \text{age}^{-0.203} (\times 0.742$  for  
5  
6  
7 female), and the number of comorbidities was defined as the sum of the  
8  
9  
10 aforementioned comorbidities in the year prior to the enrollment date. The outcome of  
11  
12  
13 the study was patient progression to CKD stage IIIb during the study period.

### 16 **The Early CKD Care Program.**

17  
18  
19 The Bureau of NHI in Taiwan launched the Early CKD Care Program in 2011.  
20  
21  
22 Patients who participated in the program constitute this study's case group. The  
23  
24  
25 program involved (i) referral to a nephrologist and provision of medication for  
26  
27  
28 hypertension, diabetes, and hyperlipidemia to delay kidney function deterioration,  
29  
30  
31 avoid damage caused by improper medication, and prevent complications; (ii) CKD  
32  
33  
34 case managers enrolled these patients and provided nursing education and lifestyle  
35  
36  
37 consultations and routinely monitored disease progress and conducted renal function  
38  
39  
40 tests, urinalysis, and urine albumin–creatinine or protein–creatinine ratio evaluations.  
41  
42  
43 The CKD case managers informed the doctors and patients' families regarding  
44  
45  
46 medical practice and care-giving. The nursing education provided during the  
47  
48  
49 enrollment period included the following: (i) teaching the basic structure and  
50  
51  
52 functions of kidneys; (ii) introducing the common symptoms of kidney conditions as  
53  
54  
55 well as the examination values; (iii) explaining daily care and prevention of kidney  
56  
57  
58 conditions; (iv) communicating the importance of routine monitoring; (v)  
59  
60

1  
2  
3  
4 communicating the importance of consulting a doctor before using medication; (vi)  
5  
6  
7 introducing kidney needle biopsy; (vii) introducing hyperlipidemia, hypertension,  
8  
9  
10 DM, kidney conditions, and their complications; and (viii) explaining dietary  
11  
12  
13 instructions. Lifestyle recommendations included the following: smoking cessation;  
14  
15  
16 weight loss, particularly for those with BMI > 25 kg/m<sup>2</sup> or men and women with a  
17  
18  
19 waist circumference of >90 and >80 cm, respectively; daily protein intake < 1.5  
20  
21  
22 gm/kg; prevention of routine or excessive alcohol consumption; adequate exercise;  
23  
24  
25 and daily salt intake < 100 mEq. Routine physical examinations were conducted at  
26  
27  
28 least once every 6 months for CKD stages I-IIIa, and urine protein, urine creatinine,  
29  
30  
31 serum creatinine, LDL, and HbA1c were tested. The control group received routine  
32  
33  
34 care and was not enrolled or monitored by CKD case managers.  
35  
36

### 37 **Statistical Analysis.**

38  
39  
40 Descriptive statistics were used to summarize the demographic data. Continuous  
41  
42  
43 variables are presented as mean and standard deviation, and categorical variables are  
44  
45  
46 presented as the number of enrollees and percentage (%). Propensity score matching  
47  
48  
49 (PSM) was used to reduce bias from age, sex, eGFR, and CKD stage. Before PSM,  
50  
51  
52 we used Student's t test to assess age and eGFR; and the chi-squared test or Fisher's  
53  
54  
55 exact test were used for sex, CKD stage, number of comorbidities, hypertension, DM,  
56  
57  
58 gout, heart disease, hyperlipidemia, and cerebrovascular disease. After PSM, we  
59  
60

1  
2  
3  
4 evaluated the differences between matched pairs using the signed rank test for  
5  
6  
7 continuous data and McNemar's test for binary data. Cox proportional hazards  
8  
9  
10 regression was used to determine the risk factors for patients progressing to CKD  
11  
12  
13 stage IIIb by including all the candidate variables in the model. Subgroup analysis  
14  
15  
16 was used to determine the risk factors for patients progressing to CKD stage IIIb from  
17  
18  
19 baseline CKD stage IIIa or the stages before it. A two-sided statistical test at 5%  
20  
21  
22 significance was used. Analyses were performed using SAS (version 7.11; SAS  
23  
24  
25 Institute, Cary, NC, USA).

### 26 27 28 **Patient and public involvement.**

29  
30  
31 The study used de-identified data from the institutional and clinical research database  
32  
33  
34 of Taipei Medical University (CRDB). No patients were involved in developing the  
35  
36  
37 research question or in determining the outcome measures. Patients were not involved  
38  
39  
40 in designing the study. There are no plans to disseminate the results of this study to  
41  
42  
43 any participants.  
44

## 45 46 **Results**

### 47 48 49 **Study Population Characteristics**

50  
51  
52 Table 1 presents the characteristics of the study population. Before PSM, a total of  
53  
54  
55 159,774 patients with stage I–IIIa CKD were enrolled from the participating hospitals,  
56  
57  
58 including 1,038 in the case group and 158,736 in the control group. All the variables  
59  
60

1  
2  
3  
4 were significantly different between the two groups (all  $P < 0.001$ ). Age was  
5  
6  
7 significantly higher in the case group than in the control group. By contrast, eGFR  
8  
9  
10 was significantly lower in the case group than that in the control group. The  
11  
12  
13 proportions of sex, CKD stage IIIa, hypertension, DM, gout, hyperlipidemia, heart  
14  
15  
16 disease, cerebrovascular disease, and proportion of number of comorbidity were  
17  
18  
19 significantly higher in the case group than in the control group. To reduce bias, 1:2  
20  
21  
22 PSM was used to match the age, sex, eGFR, and CKD stage. After PSM, 3,114  
23  
24  
25 patients with stage I–IIIa CKD from the participating hospitals during the study  
26  
27  
28 period were finally enrolled in the study, including 1,038 in the case group and 2,076  
29  
30  
31 in the control group. The proportion of hypertension, DM, gout, heart disease,  
32  
33  
34 hyperlipidemia, cerebrovascular disease, and proportion of number of comorbidity  
35  
36  
37 remained significantly higher in the case group than in the control group (all  $P <$   
38  
39  
40 0.001)  
41  
42

### 43 **Association of Early CKD Care Program and Risk Factors with Early CKD**

#### 44 **Progression**

45  
46  
47  
48  
49 Table 2 lists the crude hazard ratios (HRs) and adjusted HRs (aHRs) of all variables  
50  
51  
52 for stage I–IIIa CKD that progressed to CKD stage IIIb during the study period.  
53  
54  
55 Compared with patients in the control group, the HR for progression to CKD stage  
56  
57  
58 IIIb was 0.72 (95% confidence interval [CI], 0.61–0.85;  $P < 0.001$ ) for those  
59  
60

1  
2  
3  
4 participating in the Early CKD Care Program. After adjustments for the variables  
5  
6  
7 listed in Table 1, those in the control group still exhibited significant risk for  
8  
9  
10 progression to CKD stage IIIb (aHR, 0.67; 95% CI, 0.55–0.51;  $P < 0.001$ ). In  
11  
12  
13 addition, DM, heart disease, or cerebrovascular disease in patients with stage I–IIIa  
14  
15  
16 CKD were significant risk factors for progression to CKD stage IIIb (HR, 1.30; 95%  
17  
18  
19 CI, 1.07–1.58;  $P = 0.0075$  and aHR, 1.72; 95% CI, 1.23–2.41;  $P = 0.0015$  for DM;  
20  
21  
22 HR, 1.29; 95% CI, 1.06–1.58;  $P = 0.0132$  and aHR, 1.70; 95% CI, 1.20–2.40;  $P =$   
23  
24  
25 0.0027 for heart disease; and HR, 1.36; 95% CI, 1.04–1.78;  $P = 0.0270$  and aHR,  
26  
27  
28 1.59; 95% CI, 1.12–2.27;  $P = 0.0104$  for cerebrovascular disease). The Kaplan–Meier  
29  
30  
31 curves for the cumulative incidence of progression to CKD stage IIIb was  
32  
33  
34 significantly higher in patients with stage I–IIIa CKD who did not participate in the  
35  
36  
37 Early CKD Care Program (control group) than the curves in those who participated in  
38  
39  
40 the program (case group) during the follow-up period (log-rank test,  $P = 0.0025$ ;  
41  
42  
43 Figure 2). The median follow-up duration was 3.0 (1.0–4.7) years. Deterioration to  
44  
45  
46 CKD stage IIIb within 1, 3, and 5 years was respectively noted 374, 563, and 644  
47  
48  
49 patients in the control group and 140, 217, and 234 patients in the case group.  
50  
51  
52 Effect of Early CKD Care Program and Risk Factors on Different Early CKD Stages.  
53  
54  
55 Of the 3114 patients with stage I–IIIa CKD in this study, 1,382 patients with CKD  
56  
57  
58 stages I–II and the remaining 1,732 patients were in stage IIIa. Table 3 lists the crude  
59  
60

1  
2  
3  
4 HRs and aHRs of all variables for the progression of CKD from stage I–IIIa to IIIb  
5  
6  
7 during the study period. In the CKD stages I-II subgroup, the Early CKD Care  
8  
9  
10 Program, the number of comorbidities, and comorbid hypertension, DM, gout, heart  
11  
12  
13 disease, hyperlipidemia, and cerebrovascular disease had no significant influence on  
14  
15  
16 the progression of CKD from stage I-II to IIIb even after adjustment for the variables.  
17  
18  
19 However, in the stage IIIa CKD subgroup, compared with those in the control group,  
20  
21  
22 the HR for progression to CKD stage IIIb in those with participated in the Early CKD  
23  
24  
25 Care Program was 0.72 (95% CI, 0.60–0.87;  $P= 0.005$ ). After adjustments for the  
26  
27  
28 variables listed in Table 1, participation in the program remained a significant  
29  
30  
31 protective factor against progression to CKD stage IIIb (aHR, 0.67; 95% CI, 0.55–  
32  
33  
34 0.81;  $P< 0.001$ ). In addition, compared with patients with stage IIIa CKD but without  
35  
36  
37 DM, those with DM were at a greater risk of progression to CKD stage IIIb (HR,  
38  
39  
40 1.26; 95% CI, 1.01–1.57 and aHR, 1.69; 95% CI, 1.16–2.47; all  $P< 0.05$ ). Compared  
41  
42  
43 with patients without heart disease with CKD stage IIIa, those with heart disease with  
44  
45  
46 CKD stage IIIa were at a greater risk for progression to CKD stage IIIb after  
47  
48  
49 adjustment for the variables (aHR, 1.65; 95% CI, 1.12–2.45;  $P= 0.0124$ ).

## 51 52 **Discussion**

53  
54  
55 In this clinical observational study, we demonstrated that patients with stage I–IIIa  
56  
57  
58 CKD who participated in the Early CKD Care Program exhibited significantly  
59  
60

1  
2  
3  
4 delayed deterioration of renal function to CKD stage IIIb compared with  
5  
6  
7 nonparticipants. Participation in the program significantly delayed the progression of  
8  
9  
10 CKD from stage IIIa to IIIb. In addition, we observed that DM, heart disease, and  
11  
12  
13 cerebrovascular disease are risk factors for deterioration of renal function among  
14  
15  
16 patients with stage I–IIIa CKD.

17  
18  
19 Compared with the control group, the case group had a higher mean age, a lower  
20  
21  
22 eGFR, a higher proportion of CKD stage IIIa, and more comorbidities before PSM. In  
23  
24  
25 real-life clinical scenarios, these disparities are reasonable. First, patients with stage I  
26  
27  
28 and II CKD typically have no noticeable symptom;<sup>4</sup> hence, they are typically not  
29  
30  
31 referred to a nephrologist. Second, patients with CKD stage IIIa are more likely to  
32  
33  
34 have clinical symptoms and therefore consult a nephrologist or seek medical attention.  
35  
36  
37 Third, patients with CKD IIIa with more comorbidities are more likely to be referred  
38  
39  
40 to a nephrologist than are those with fewer comorbidities. Fourth, older patients with  
41  
42  
43 more comorbidities are also likely to be referred to specialists. The CKD managers  
44  
45  
46 frequently encouraged those with clinical symptoms who consulted nephrologist,  
47  
48  
49 those with more comorbidities, or older patients to participate in the Early CKD Care  
50  
51  
52 Program. However, each patient's will and motivation also played a role. Therefore,  
53  
54  
55 to reduce the bias of basic characteristics between the two groups, PSM was used to  
56  
57  
58 match variables such as age, sex, eGFR, and CKD stage for further analysis.  
59  
60



1  
2  
3  
4 After PSM, we observed that the case group still had more comorbidities such as  
5  
6  
7 hypertension, DM, gout, dyslipidemia, heart disease, and cerebrovascular disease than  
8  
9  
10 did the control group. Hypertension and CKD are closely interlinked. Uncontrolled  
11  
12  
13 hypertension can cause significant cardiovascular morbidity and mortality and  
14  
15  
16 accelerate CKD progression.<sup>11</sup> Blood pressure control is essential to preventing CKD  
17  
18  
19 progression and cardiovascular disease development.<sup>12</sup> DM is also a major cause of  
20  
21  
22 CKD and a risk factor for CKD and cardiovascular disease progression.<sup>13-15</sup> Patients  
23  
24  
25 with DM have a 3.8 times higher risk of CKD than do those without DM.<sup>15</sup> Of  
26  
27  
28 patients with type 2 DM, 42.3% have kidney injury.<sup>2</sup> Compared with patients with  
29  
30  
31 CKD without DM, those with DM developed earlier and more severe CKD  
32  
33  
34 complications,<sup>16</sup> because intracellular hyperglycemia leads to endothelial dysfunction,  
35  
36  
37 increased oxidative stress, and protein accumulation on the vascular wall, which cause  
38  
39  
40 microvascular and macrovascular complications,<sup>17</sup> including atherosclerotic  
41  
42  
43 renovascular disease, cardiovascular disease, and cerebrovascular disease.  
44  
45  
46 In addition to hypertension and DM, gout is independently associated with CKD.<sup>18</sup>  
47  
48  
49 Patients with hyperuricemia are particularly susceptible to gout development.  
50  
51  
52 Hyperuricemia is an independent risk factor for CKD, and hyperuricemia treatment  
53  
54  
55 may delay CKD progression.<sup>19, 20</sup> Chronic hyperuricemia is associated with the  
56  
57  
58 development of hypertension, metabolic syndrome, CKD, and cardiovascular  
59  
60

1  
2  
3  
4 disease.<sup>21</sup> Dyslipidemia is a risk factor for CKD, and CKD causes alterations in the  
5  
6  
7 lipoprotein profile. Therefore, the dyslipidemia–CKD relationship is reciprocal.<sup>22</sup> In  
8  
9  
10 addition to hypertension and DM, dyslipidemia is a major cause of cardiovascular and  
11  
12  
13 cerebrovascular disease in patients with CKD. Dyslipidemia treatment in patients with  
14  
15  
16 early CKD can reduce the occurrence of cardiovascular events and improve  
17  
18  
19 associated outcomes.<sup>23</sup> According to the aforementioned discussion, the high  
20  
21  
22 proportion of heart and cerebrovascular disease in the case group is to be expected  
23  
24  
25 because these risk factors contribute to heart and cerebrovascular disease. In theory,  
26  
27  
28 CKD in patients with more comorbidities should more rapidly progress from stage I–  
29  
30  
31 IIIa to IIIb than do those with fewer comorbidities. However, in our study, despite  
32  
33  
34 having more comorbidities, the case group had better renal outcomes than did the  
35  
36  
37 control group. Therefore, the Early CKD Care Program was instrumental in delaying  
38  
39  
40 renal function deterioration.

41  
42  
43 In addition, the effect of the Early CKD Care Program on the progression of CKD  
44  
45  
46 from early stages to stage IIIb was analyzed. We found that participation in the  
47  
48  
49 program significantly delayed the progression of CKD from stage IIIa to IIIb, but we  
50  
51  
52 observed no significant results for the progression of CKD from stages I–II to IIIb.

53  
54  
55 Although the case group had low HRs for CKD stage IIIb compared with the control  
56  
57  
58 group, the difference remained nonsignificant. CKD progression from stage I–II to  
59  
60

1  
2  
3  
4 IIIb might require more time; hence, few patients in the control group with stage I-II  
5  
6  
7 CKD progressed to CKD stage IIIb during the follow-up period. Although some  
8  
9  
10 studies have developed clinical predication models for CKD, their study groups had  
11  
12 stages III- IV CKD and ESRD was defined as the outcome.<sup>24,25</sup> No available clinical  
13  
14 predication model was designed for CKD stages I-II or IIIa-IIIb. Further investigation  
15  
16 employing clinical predication models for early to advanced CKD is warranted.  
17  
18  
19 In our clinical study, patients with stage I–IIIa CKD with DM, heart disease, or  
20  
21 cerebrovascular disease exhibited considerable risk of progression to CKD stage IIIb.  
22  
23  
24 The results are similar to those of the KEEP<sup>4</sup> and a population-level cohort study by  
25  
26 Tonelli.<sup>26</sup> DM and heart disease are also significant risk factor for progression of CKD  
27  
28 from stage IIIa to IIIb. Therefore, in addition to the Early CKD Care Program, the  
29  
30 Diabetes Shared Care Program (DSCP) must be implemented because the DSCP  
31  
32 reduces cardiovascular and cerebrovascular event and mortality risks.<sup>27</sup>  
33  
34  
35 The current study had some limitations. First, the CRDB only included data from  
36  
37 three educational medical institutions located in New Taipei City and Taipei City in  
38  
39 Taiwan. The greater Taipei area has adequate medical resources, which might not be  
40  
41 representative of all clinical situations in Taiwan because of the urban–rural medical  
42  
43 disparity. Second, participation in the care program was voluntary; therefore, patients’  
44  
45 motivation and the encouragement of medical personnel possibly played a role, and  
46  
47  
48  
49  
50  
51  
52  
53  
54  
55  
56  
57  
58  
59  
60

1  
2  
3  
4 thus, selection bias should be considered. Third, the clinical outcome of our study was  
5  
6  
7 limited to the progression of early CKD, rather than being a comprehensive  
8  
9  
10 assessment of cardiovascular events and mortality. Finally, the ethnicity of most of  
11  
12  
13 Taiwan's population is Chinese; thus, the results might not be generalizable to  
14  
15  
16 populations of other ethnic backgrounds.

17  
18  
19 In conclusion, this study revealed that patients with stage I–IIIa CKD who  
20  
21  
22 participated in the Early CKD Care Program benefited from a reduction in renal  
23  
24  
25 function deterioration. This program should be promoted and implemented  
26  
27  
28 particularly for those with stage IIIa CKD.  
29  
30  
31  
32  
33

#### 34 **Author affiliations**

35  
36  
37 <sup>1</sup>Department of Nursing, Shin Kong Wu Ho-Su Memorial Hospital, Taipei, Taiwan  
38

39  
40 <sup>2</sup>Department of Nursing, Fu Jen Catholic University, New Taipei, Taiwan  
41

42  
43 <sup>3</sup>College of Nursing, Taipei Medical University, Taipei, Taiwan  
44

45  
46 <sup>4</sup>Division of Nephrology, Department of Internal Medicine, Shin-Kong Wu Ho-Su  
47  
48 Memorial Hospital, Taipei, Taiwan  
49

50  
51  
52 <sup>5</sup>School of Medicine, Fu-Jen Catholic University, New Taipei, Taiwan  
53

54  
55 <sup>6</sup>Clinical Data Center, Office of Data Science, Taipei Medical University, Taipei,  
56  
57  
58 Taiwan  
59  
60

1  
2  
3  
4 <sup>7</sup>Division of Cardiovascular Surgery, Shin Kong Wu Ho-Su Memorial Hospital,  
5  
6  
7 Taipei, Taiwan  
8

9  
10 <sup>8</sup>Graduate Institute of Biomedical Informatics, Taipei Medical University, Taipei,  
11  
12  
13 Taiwan  
14

15  
16 <sup>9</sup>Clinical Big Data Research Center, Taipei Medical University Hospital, Taipei,  
17  
18  
19 Taiwan  
20

21  
22 **Acknowledgments** None  
23

24  
25 **Contributors** All authors reviewed the manuscript. S.-F.N. collected and interpreted  
26  
27 the data and wrote the manuscript. N.-C.C. and T.-H.C. ran the data and performed  
28  
29 statistical analyses. S.-F.N. and C.-K.W. determined the concept and design of this  
30  
31 study. Y.-B.Y. contributed to the manuscript revision. T.-H.C. and C.-K.W. helped to  
32  
33 write the manuscript and conceived the study.  
34  
35  
36  
37  
38

39  
40 **Funding** None  
41

42  
43 **Competing interests** None declared  
44

45  
46 **Ethics approval** The study was approved by the Institutional Review Board of Taipei  
47  
48 Medical University (TMU-JIRB-201803022).  
49

50  
51  
52 **Provenance and peer review** Not commissioned; externally peer reviewed  
53

54  
55 **Data availability statement** No additional data are available.  
56  
57  
58  
59  
60

## References

1. Bello AK, Levin A, Tonelli M *et al.* Assessment of Global Kidney Health Care Status. *JAMA* 2017; 317(18):1864-81
2. Hill NR, Fatoba ST, Oke JL *et al.* Global Prevalence of Chronic Kidney Disease - A Systematic Review and Meta-Analysis. *PLoS One* 2016;11(7):e0158765
3. Stenvinkel P. Chronic kidney disease: a public health priority and harbinger of premature cardiovascular disease. *J Intern Med* 2010; 268(5):456-67
4. Agrawal V, Jaar BG, Frisby XY *et al.* Access to health care among adults evaluated for CKD: findings from the Kidney Early Evaluation Program (KEEP). *American journal of kidney diseases : the official journal of the National Kidney Foundation* 2012; 59(3 Suppl 2):S5-15
5. Mills KT, Xu Y, Zhang W *et al.* A systematic analysis of worldwide population-based data on the global burden of chronic kidney disease in 2010. *Kidney Int* 2015; 88(5):950-7
6. Webster AC, Nagler EV, Morton RL *et al.* Chronic Kidney Disease. *The Lancet* 2017; 389(10075):1238-52
7. Saran R, Robinson B, Abbott KC *et al.* US Renal Data System 2018 Annual Data Report: Epidemiology of Kidney Disease in the United States. *American journal of kidney diseases : the official journal of the National Kidney Foundation* 2019; 73(3S1):A7-A8

- 1  
2  
3  
4 8. Yamagata K, Makino H, Iseki K *et al.* Effect of Behavior Modification on  
5  
6  
7 Outcome in Early- to Moderate-Stage Chronic Kidney Disease: A Cluster-  
8  
9  
10 Randomized Trial. PLoS One 2016; 11(3):e0151422  
11  
12  
13 9. Stack AG. Impact of timing of nephrology referral and pre-ESRD care on  
14  
15  
16 mortality risk among new ESRD patients in the United States. American journal of  
17  
18  
19 kidney diseases : the official journal of the National Kidney Foundation 2003;  
20  
21  
22 41(2):310-8  
23  
24  
25 10. Lin MY, Cheng LJ, Chiu YW *et al.* Effect of national pre-ESRD care program  
26  
27  
28 on expenditures and mortality in incident dialysis patients: A population-based study.  
29  
30  
31 PLoS One 2018; 13(6):e0198387  
32  
33  
34 11. Ku E, Lee BJ, Wei J *et al.* Hypertension in CKD: Core Curriculum 2019.  
35  
36  
37 American journal of kidney diseases : the official journal of the National Kidney  
38  
39  
40 Foundation 2019; 74(1):120-31  
41  
42  
43 12. Kusaba T, Kimura K. [Management of hypertension in CKD patients]. Nihon  
44  
45  
46 Rinsho 2008; 66(9):1747-52  
47  
48  
49 13. Dare AJ, Fu SH, Patra J *et al.* Renal failure deaths and their risk factors in India  
50  
51  
52 2001–13: nationally representative estimates from the Million Death Study. The  
53  
54  
55 Lancet Global Health 2017; 5(1):e89-e95  
56  
57  
58 14. Wen CP, Cheng TYD, Tsai MK *et al.* All-cause mortality attributable to chronic  
59  
60

1  
2  
3  
4 kidney disease: a prospective cohort study based on 462 293 adults in Taiwan. The

5  
6  
7 Lancet 2008; 371(9631):2173-82

8  
9  
10 15. McCullough PA, Steigerwalt S, Tolia K *et al.* Cardiovascular disease in chronic

11  
12  
13 kidney disease: data from the Kidney Early Evaluation Program (KEEP). *Curr Diab*

14  
15  
16 Rep 2011; 11(1):47-55

17  
18  
19 16. Winocour PH. Diabetes and chronic kidney disease: an increasingly common

20  
21  
22 multi-morbid disease in need of a paradigm shift in care. *Diabet Med* 2018;

23  
24  
25 35(3):300-5

26  
27  
28 17. Peters E, van Elsas A, Heemskerk S *et al.* Alkaline phosphatase as a treatment of

29  
30  
31 sepsis-associated acute kidney injury. *J Pharmacol Exp Ther* 2013; 344(1):2-7

32  
33  
34 18. Roughley MJ, Belcher J, Mallen CD *et al.* Gout and risk of chronic kidney

35  
36  
37 disease and nephrolithiasis: meta-analysis of observational studies. *Arthritis Res Ther*

38  
39  
40 2015; 17:90

41  
42  
43 19. Zhao G, Huang L, Song M *et al.* Baseline serum uric acid level as a predictor of

44  
45  
46 cardiovascular disease related mortality and all-cause mortality: a meta-analysis of

47  
48  
49 prospective studies. *Atherosclerosis* 2013; 231(1):61-8

50  
51  
52 20. Ishihara M, Urushido M, Hamada K *et al.* Sestrin-2 and BNIP3 regulate

53  
54  
55 autophagy and mitophagy in renal tubular cells in acute kidney injury. *Am J Physiol*

56  
57  
58 Renal Physiol 2013; 305(4):F495-509



- 1  
2  
3  
4 21. Borghi C, Rosei EA, Bardin T *et al.* Serum uric acid and the risk of  
5  
6  
7 cardiovascular and renal disease. *J Hypertens* 2015; 33(9):1729-41  
8  
9  
10 22. Bermudez-Lopez M, Arroyo D, Betriu A *et al.* New perspectives on CKD-  
11  
12 induced dyslipidemia. *Expert opinion on therapeutic targets* 2017; 21(10):967-76  
13  
14  
15 23. Galvao TF, Araujo ME, Penha AP *et al.* Statins for early stage chronic kidney  
16  
17 disease: an overview of reviews. *Cardiovascular & hematological disorders drug*  
18  
19 targets 2014; 14(3):205-11  
20  
21  
22 24. Tangri N, Stevens LA, Griffith J *et al.* A predictive model for progression of  
23  
24 chronic kidney disease to kidney failure. *JAMA* 2011; 305(15):1553-9  
25  
26  
27 25. Hasegawa T, Sakamaki K, Koiwa F *et al.* Clinical prediction models for  
28  
29 progression of chronic kidney disease to end-stage kidney failure under pre-dialysis  
30  
31 nephrology care: results from the Chronic Kidney Disease Japan Cohort Study. *Clin*  
32  
33 *Exp Nephrol* 2019; 23(2):189-98  
34  
35  
36  
37 26. Tonelli M, Muntner P, Lloyd A *et al.* Risk of coronary events in people with  
38  
39 chronic kidney disease compared with those with diabetes: a population-level cohort  
40  
41 study. *The Lancet* 2012; 380(9844):807-14  
42  
43  
44  
45 27. Kornelius E, Chiou JY, Yang YS *et al.* The Diabetes Shared Care Program and  
46  
47 Risks of Cardiovascular Events in Type 2 Diabetes. *The American journal of*  
48  
49 *medicine* 2015; 128(9):977-85  
50  
51  
52  
53  
54  
55  
56  
57  
58  
59  
60

1  
2  
3  
4 **Figure 1. Flow of patient selection for the study cohort.**  
5

6  
7 From January 2012 to August 2017, 307,762 patients with chronic kidney disease  
8  
9  
10 (CKD) with more than two visits to the participating hospitals were identified in the  
11  
12  
13 institutional and clinical research database of Taipei Medical University. Adult  
14  
15  
16 nonpregnant patients with CKD who met the specific criteria of stage I–IIIa CKD  
17  
18  
19 were regarded as patients with early CKD. Those who participated in the Early CKD  
20  
21  
22 Care Program comprised the case group, and those not participating in the program  
23  
24  
25 served as the control group. We conducted 1:2 propensity score matching with age,  
26  
27  
28 sex, estimated glomerular filtration rate, and CKD stage to reduce selection bias in the  
29  
30  
31 control group.  
32  
33  
34  
35  
36

37 **Figure 2. Cumulative incidence of progression to chronic kidney disease (CKD)**  
38  
39  
40 **stage IIIb in patients with stage I–IIIa CKD in case and control groups.**  
41

42  
43 Kaplan–Meier analysis revealed that the cumulative incidence of progression to CKD  
44  
45  
46 stage IIIb was significantly higher in patients with stage I–IIIa CKD who did not  
47  
48  
49 participate in the Early CKD Care Program compared with that of those who  
50  
51  
52 participated in the program, during the follow-up period (log-rank test,  $P = 0.02$   
53  
54  
55  
56  
57  
58  
59  
60

**Table 1. Baseline characteristics of enrollees**

|                    | Before propensity score matching |                    |                      |                | After propensity score matching |                    |                    |                |
|--------------------|----------------------------------|--------------------|----------------------|----------------|---------------------------------|--------------------|--------------------|----------------|
|                    | Total                            | Case group         | Control group        | <i>P</i> value | Total                           | Case group         | Control group      | <i>P</i> value |
|                    | n = 159,774<br>N (%)             | n = 1,038<br>N (%) | n = 158,736<br>N (%) |                | n = 3,114<br>N (%)              | n = 1,038<br>N (%) | n = 2,076<br>N (%) |                |
| Age                | 59.1 ± 16.1                      | 66.4 ± 12.8        | 59.1 ± 16.1          | < 0.0001       | 66.6 ± 14.4                     | 66.4 ± 12.8        | 66.7 ± 15.2        | 0.5917         |
| Sex, male          | 89933 (56.3)                     | 697 (67.2)         | 89236 (56.2)         | < 0.0001       | 2054 (66.0)                     | 697 (67.2)         | 1357 (65.7)        | 0.3358         |
| eGFR               | 79.2 ± 14.0                      | 62.2 ± 12.9        | 79.3 ± 13.9          | < 0.0001       | 62.2 ± 13.2                     | 62.2 ± 12.9        | 62.2 ± 13.3        | 0.8842         |
| CKD Stage          |                                  |                    |                      | < 0.0001       |                                 |                    |                    | 0.6009         |
| 1                  | 44066 (27.6)                     | 53 (5.1)           | 44013 (27.7)         |                | 166 (5.3)                       | 53 (5.1)           | 113 (5.4)          |                |
| 2                  | 96435 (60.4)                     | 418 (40.3)         | 96017 (60.5)         |                | 1216 (39.1)                     | 418 (40.3)         | 798 (38.4)         |                |
| 3a                 | 19273 (12.1)                     | 567 (54.6)         | 18706 (11.8)         |                | 1732 (55.6)                     | 567 (54.6)         | 1165 (56.1)        |                |
| Comorbidity number |                                  |                    |                      | < 0.0001       |                                 |                    |                    | < 0.0001       |
| 0                  | 81576 (51.1)                     | 66 (6.4)           | 81510 (51.4)         |                | 977 (31.4)                      | 66 (6.4)           | 911 (43.9)         |                |
| 1                  | 33519 (21.0)                     | 221 (21.3)         | 33298 (21.0)         |                | 698 (22.4)                      | 221 (21.3)         | 477 (23.0)         |                |
| 2                  | 25865 (16.2)                     | 303 (29.2)         | 25562 (16.1)         |                | 712 (22.9)                      | 303 (29.2)         | 409 (19.7)         |                |
| 3+                 | 18814 (11.8)                     | 448 (43.2)         | 18366 (11.6)         |                | 727 (23.4)                      | 448 (43.2)         | 279 (13.4)         |                |
| Hypertension       | 44998 (28.2)                     | 755 (72.7)         | 44243 (27.9)         | < 0.0001       | 1448 (46.5)                     | 755 (72.7)         | 693 (33.4)         | < 0.0001       |
| DM                 | 22601 (14.2)                     | 399 (38.4)         | 22202 (14.0)         | < 0.0001       | 780 (25.1)                      | 399 (38.4)         | 381 (18.4)         | < 0.0001       |
| Gout               | 7563 (4.73)                      | 257 (24.8)         | 7306 (4.6)           | < 0.0001       | 374 (12.0)                      | 257 (24.8)         | 117 (5.6)          | < 0.0001       |
| Hyperlipidemia     | 28629 (17.9)                     | 549 (52.9)         | 28080 (17.7)         | < 0.0001       | 882 (28.3)                      | 549 (52.9)         | 333 (16.0)         | < 0.0001       |

|                         |              |            |              |          |            |            |            |          |
|-------------------------|--------------|------------|--------------|----------|------------|------------|------------|----------|
| Heart disease           | 30692 (19.2) | 318 (30.6) | 30374 (19.1) | < 0.0001 | 779 (25.0) | 318 (30.6) | 461 (22.2) | < 0.0001 |
| Cerebrovascular disease | 12143 (7.6)  | 132 (12.7) | 12011 (7.6)  | < 0.0001 | 356 (11.4) | 132 (12.7) | 224 (10.8) | < 0.0001 |

eGFR, estimated glomerular filtration rate; CKD, chronic kidney disease; DM, diabetes mellitus.

Matched variables were age, sex, eGFR, and CKD stage.

For peer review only

**Table 2. Univariate and multivariate Cox regression analysis of study population (n = 3,114)**

| Group                   | Univariate        |          | Multivariate*     |          |
|-------------------------|-------------------|----------|-------------------|----------|
|                         | HR (95%CI)        | P value  | aHR (95%CI)       | P value  |
| Control                 | ref               |          | ref               |          |
| Case                    | 0.72 (0.61, 0.85) | < 0.0001 | 0.67 (0.55, 0.81) | < 0.0001 |
| Comorbidity number      |                   |          |                   |          |
| 0                       | ref               |          | ref               |          |
| 1                       | 0.99 (0.77, 1.29) | 0.9687   | 0.80 (0.54, 1.17) | 0.2438   |
| 2                       | 0.94 (0.73, 1.21) | 0.6374   | 0.54 (0.29, 1.02) | 0.0592   |
| 3+                      | 1.16 (0.93, 1.46) | 0.1931   | 0.46 (0.17, 1.23) | 0.1195   |
| Hypertension            |                   |          |                   |          |
| No                      | ref               |          | ref               |          |
| Yes                     | 0.98 (0.82, 1.16) | 0.7803   | 1.24 (0.85, 1.81) | 0.2654   |
| DM                      |                   |          |                   |          |
| No                      | ref               |          | ref               |          |
| Yes                     | 1.30 (1.07, 1.58) | 0.0075   | 1.72 (1.23, 2.41) | 0.0015   |
| Gout                    |                   |          |                   |          |
| No                      | ref               |          | ref               |          |
| Yes                     | 0.86 (0.67, 1.11) | 0.2577   | 1.25 (0.87, 1.77) | 0.2241   |
| Hyperlipidemia          |                   |          |                   |          |
| No                      | ref               |          | ref               |          |
| Yes                     | 0.98 (0.81, 1.19) | 0.8467   | 1.26 (0.88, 1.80) | 0.2152   |
| Heart disease           |                   |          |                   |          |
| No                      | ref               |          | ref               |          |
| Yes                     | 1.29 (1.06, 1.58) | 0.0132   | 1.70 (1.20, 2.40) | 0.0027   |
| Cerebrovascular disease |                   |          |                   |          |
| No                      | ref               |          | ref               |          |
| Yes                     | 1.36 (1.04, 1.78) | 0.0270   | 1.59 (1.12, 2.27) | 0.0104   |

DM, diabetes mellitus; aHR, adjusted hazard ratio; CI, confidence interval.

\*The multivariable model was adjusted for all variables.

**Table 3. Univariate and multivariate Cox regression analysis of subgroups**

| Group              | Baseline Stage < 3a<br>n = 1,382 |         |                   |         | Baseline Stage = 3a<br>n = 1,732 |         |                   |          |
|--------------------|----------------------------------|---------|-------------------|---------|----------------------------------|---------|-------------------|----------|
|                    | Univariate                       |         | Multivariate*     |         | Univariate                       |         | Multivariate*     |          |
|                    | HR (95%CI)                       | P value | aHR (95%CI)       | P value | HR (95%CI)                       | P value | aHR (95%CI)       | P value  |
| Control            | ref                              |         | ref               |         | ref                              |         | ref               |          |
| Case               | 0.75 (0.52, 1.08)                | 0.1244  | 0.75 (0.48, 1.17) | 0.2059  | 0.72 (0.60, 0.87)                | 0.0005  | 0.34 (0.51, 0.80) | < 0.0001 |
| Comorbidity number |                                  |         |                   |         |                                  |         |                   |          |
| 0                  | ref                              |         | ref               |         | ref                              |         | ref               |          |
| 1                  | 0.61 (0.33, 1.12)                | 0.1090  | 0.50 (0.20, 1.26) | 0.1420  | 1.09 (0.82, 1.46)                | 0.5593  | 0.87 (0.56, 1.35) | 0.5345   |
| 2                  | 0.82 (0.49, 1.38)                | 0.4528  | 0.59 (0.14, 2.48) | 0.4753  | 0.95 (0.71, 1.27)                | 0.7322  | 0.51 (0.25, 1.05) | 0.0664   |
| 3+                 | 0.99 (0.57, 1.72)                | 0.9617  | 0.64 (0.06, 6.54) | 0.7025  | 1.18 (0.91, 1.52)                | 0.2062  | 0.39 (0.13, 1.20) | 0.1013   |
| Hypertension       |                                  |         |                   |         |                                  |         |                   |          |
| No                 | ref                              |         | ref               |         | ref                              |         | ref               |          |
| Yes                | 0.93 (0.63, 1.36)                | 0.6964  | 1.10 (0.45, 2.66) | 0.7025  | 0.99 (0.81, 1.20)                | 0.8805  | 1.32 (0.86, 2.03) | 0.2019   |
| DM                 |                                  |         |                   |         |                                  |         |                   |          |
| No                 | ref                              |         | ref               |         | ref                              |         | ref               |          |
| Yes                | 1.48 (0.94, 2.34)                | 0.0932  | 1.99 (0.87, 4.54) | 0.1032  | 1.26 (1.01, 1.57)                | 0.0385  | 1.69 (1.16, 2.47) | 0.0065   |
| Gout               |                                  |         |                   |         |                                  |         |                   |          |
| No                 | ref                              |         | ref               |         | ref                              |         | ref               |          |

|    |                         |                   |        |                   |        |                   |        |                   |        |
|----|-------------------------|-------------------|--------|-------------------|--------|-------------------|--------|-------------------|--------|
| 1  |                         |                   |        |                   |        |                   |        |                   |        |
| 2  |                         |                   |        |                   |        |                   |        |                   |        |
| 3  |                         |                   |        |                   |        |                   |        |                   |        |
| 4  |                         |                   |        |                   |        |                   |        |                   |        |
| 5  | Yes                     | 0.79 (0.43, 1.46) | 0.4536 | 1.05 (0.45, 2.43) | 0.9181 | 0.89 (0.67, 1.19) | 0.4329 | 1.34 (0.90, 1.99) | 0.1525 |
| 6  | Hyperlipidemia          |                   |        |                   |        |                   |        |                   |        |
| 7  |                         |                   |        |                   |        |                   |        |                   |        |
| 8  | No                      | ref               |        | ref               |        | ref               |        | ref               |        |
| 9  | Yes                     | 0.73 (0.48, 1.11) | 0.1404 | 0.76 (0.34, 1.70) | 0.5014 | 1.07 (0.87, 1.33) | 0.5204 | 1.52 (0.99, 2.30) | 0.0507 |
| 10 | Heart disease           |                   |        |                   |        |                   |        |                   |        |
| 11 |                         |                   |        |                   |        |                   |        |                   |        |
| 12 | No                      | ref               |        | ref               |        | ref               |        | ref               |        |
| 13 | Yes                     | 1.20 (0.74, 1.93) | 0.4599 | 1.47 (0.70, 3.12) | 0.3093 | 1.24 (0.99, 1.56) | 0.0618 | 1.65 (1.12, 2.45) | 0.0124 |
| 14 | Cerebrovascular disease |                   |        |                   |        |                   |        |                   |        |
| 15 |                         |                   |        |                   |        |                   |        |                   |        |
| 16 | No                      | ref               |        | ref               |        | ref               |        | ref               |        |
| 17 | Yes                     | 1.78 (0.97, 3.28) | 0.0644 | 1.89 (0.84, 4.26) | 0.1247 | 1.25 (0.92, 1.70) | 0.1602 | 1.48 (0.99, 2.21) | 0.0576 |

DM, diabetes mellitus; HR, hazard ratio; aHR, adjusted HR.

\*The multivariable model was adjusted for all variables.

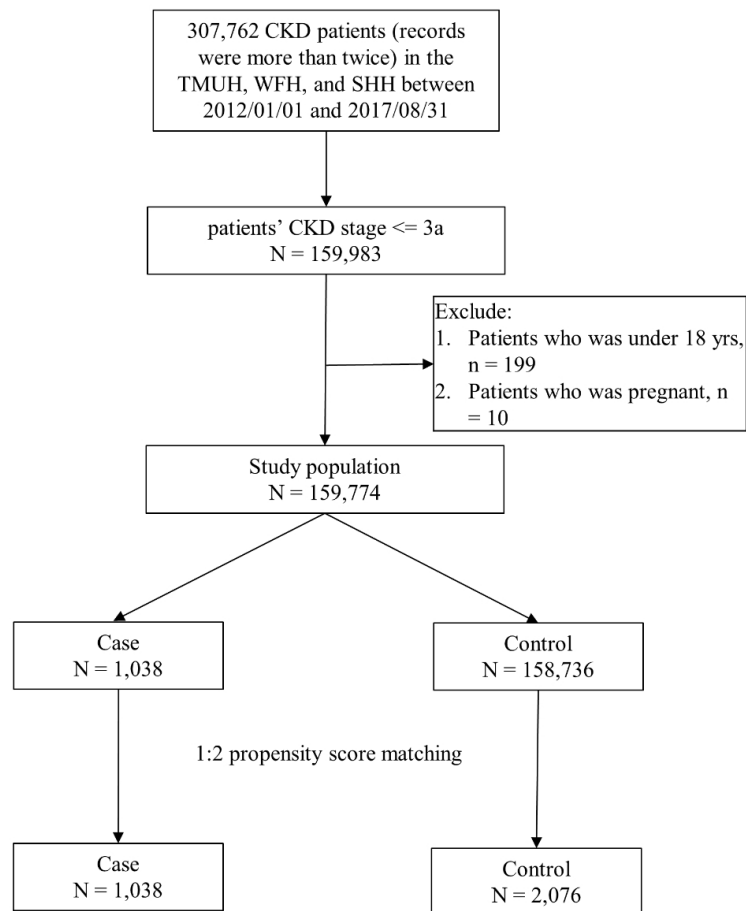

Figure 1. Flow chart of study population.

Figure 1. Flow of patient selection for the study cohort.

From January 2012 to August 2017, 307,762 patients with chronic kidney disease (CKD) with more than two visits to the participating hospitals were identified in the institutional and clinical research database of Taipei Medical University. Adult nonpregnant patients with CKD who met the specific criteria of stage I–IIIa CKD were regarded as patients with early CKD. Those who participated in the Early CKD Care Program comprised the case group, and those not participating in the program served as the control group. We conducted 1:2 propensity score matching with age, sex, estimated glomerular filtration rate, and CKD stage to reduce selection bias in the control group.

107x109mm (300 x 300 DPI)



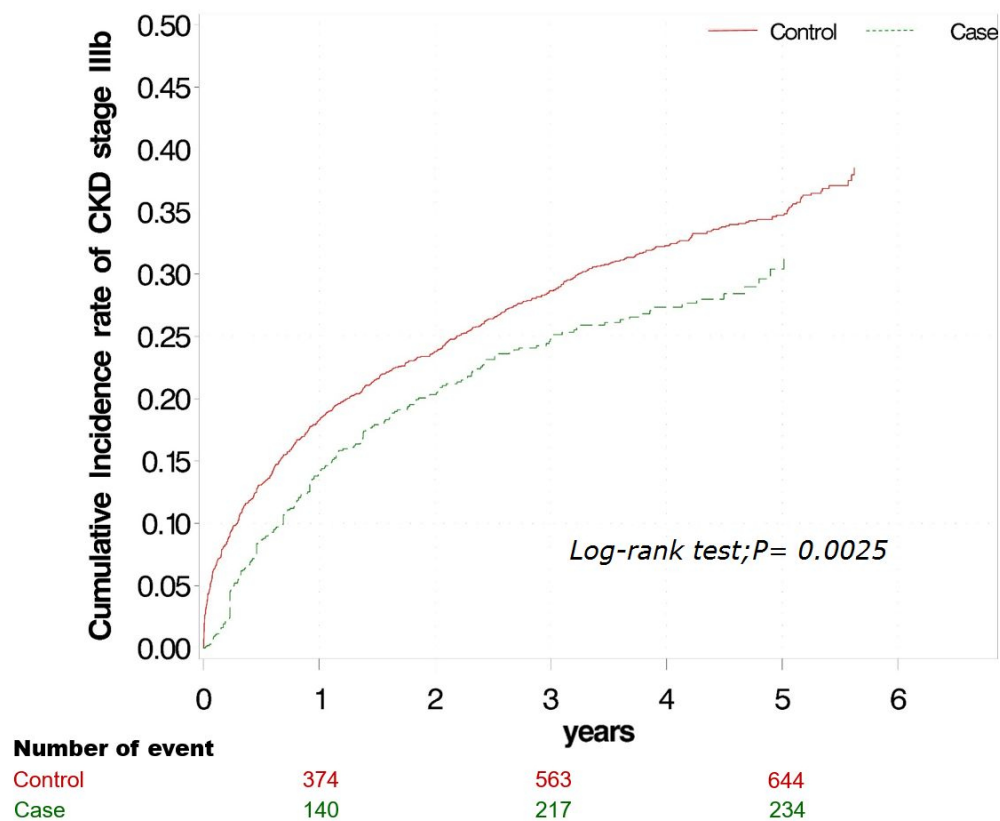

34 Figure 2. Cumulative incidence of progression to chronic kidney disease (CKD) stage IIIb in patients with  
35 stage I–IIIa CKD in case and control groups.

36 Kaplan–Meier analysis revealed that the cumulative incidence of progression to CKD stage IIIb was  
37 significantly higher in patients with stage I–IIIa CKD who did not participate in the Early CKD Care Program  
38 compared with that of those who participated in the program, during the follow-up period (log-rank test,  $P =$   
39 0.025)

40 95x80mm (300 x 300 DPI)

1  
2  
3  
4 **Effect of Early Chronic Kidney Disease Care Program on Kidney Function**

5  
6  
7 **Deterioration in Patients With Stage I–IIIa Chronic Kidney Disease**

8  
9  
10 Shu-Fen Niu, Chung-Kuan Wu, Nai-Chen Chuang, Ya-Bei Yang, Tzu-Hao Chang

11  
12  
13 **Supplementary material**

14  
15  
16 **Table S1.** International Classification of Diseases, ninth Revision, Clinical

17  
18  
19 Modification codes used to identify comorbid conditions in this study.  
20  
21  
22  
23  
24  
25  
26  
27  
28  
29  
30  
31  
32  
33  
34  
35  
36  
37  
38  
39  
40  
41  
42  
43  
44  
45  
46  
47  
48  
49  
50  
51  
52  
53  
54  
55  
56  
57  
58  
59  
60

1  
2  
3  
4  
5  
6  
7  
8  
9  
10  
11  
12  
13  
14  
15  
16  
17  
18  
19  
20  
21  
22  
23  
24  
25  
26  
27  
28  
29  
30  
31  
32  
33  
34  
35  
36  
37  
38  
39  
40  
41  
42  
43  
44  
45  
46

**Table S1.** International Classification of Diseases, ninth Revision, Clinical Modification codes used to identify comorbid conditions in this study.

| Co-morbid diseases      | Corresponding ICD-9-CM codes |
|-------------------------|------------------------------|
| Hypertension            | 401.x–405.x                  |
| Diabetes mellitus       | 250.x                        |
| Gout                    | 274.x                        |
| Hyperlipidemia          | 272.x                        |
| Heart disease           | 410.x–414.x; 420.x–429.x     |
| Cerebrovascular disease | 430.x–438.x                  |

For peer review only

**STROBE 2007 (v4) Statement—Checklist of items that should be included in reports of *cohort studies***

| Section/Topic                | Item # | Recommendation                                                                                                                                                                       | Reported on page # |
|------------------------------|--------|--------------------------------------------------------------------------------------------------------------------------------------------------------------------------------------|--------------------|
| <b>Title and abstract</b>    | 1      | (a) Indicate the study's design with a commonly used term in the title or the abstract                                                                                               | 1,2,3              |
|                              |        | (b) Provide in the abstract an informative and balanced summary of what was done and what was found                                                                                  | 2,3                |
| <b>Introduction</b>          |        |                                                                                                                                                                                      |                    |
| Background/rationale         | 2      | Explain the scientific background and rationale for the investigation being reported                                                                                                 | 4,5                |
| Objectives                   | 3      | State specific objectives, including any prespecified hypotheses                                                                                                                     | 5                  |
| <b>Methods</b>               |        |                                                                                                                                                                                      |                    |
| Study design                 | 4      | Present key elements of study design early in the paper                                                                                                                              | 5,6,7              |
| Setting                      | 5      | Describe the setting, locations, and relevant dates, including periods of recruitment, exposure, follow-up, and data collection                                                      | 5,6,7              |
| Participants                 | 6      | (a) Give the eligibility criteria, and the sources and methods of selection of participants. Describe methods of follow-up                                                           | 5,6,7,8            |
|                              |        | (b) For matched studies, give matching criteria and number of exposed and unexposed                                                                                                  | Not applicable     |
| Variables                    | 7      | Clearly define all outcomes, exposures, predictors, potential confounders, and effect modifiers. Give diagnostic criteria, if applicable                                             | 6,7                |
| Data sources/<br>measurement | 8*     | For each variable of interest, give sources of data and details of methods of assessment (measurement). Describe comparability of assessment methods if there is more than one group | 5,6,7,8,9          |
| Bias                         | 9      | Describe any efforts to address potential sources of bias                                                                                                                            | 8,9,16             |
| Study size                   | 10     | Explain how the study size was arrived at                                                                                                                                            | 5,6                |
| Quantitative variables       | 11     | Explain how quantitative variables were handled in the analyses. If applicable, describe which groupings were chosen and why                                                         | 8,9                |
| Statistical methods          | 12     | (a) Describe all statistical methods, including those used to control for confounding                                                                                                | 8,9                |
|                              |        | (b) Describe any methods used to examine subgroups and interactions                                                                                                                  | 8,9                |
|                              |        | (c) Explain how missing data were addressed                                                                                                                                          | 8,9                |
|                              |        | (d) If applicable, explain how loss to follow-up was addressed                                                                                                                       | 8,9                |
|                              |        | (e) Describe any sensitivity analyses                                                                                                                                                | 8,9                |
| <b>Results</b>               |        |                                                                                                                                                                                      |                    |

|                          |     |                                                                                                                                                                                                              |                         |
|--------------------------|-----|--------------------------------------------------------------------------------------------------------------------------------------------------------------------------------------------------------------|-------------------------|
| Participants             | 13* | (a) Report numbers of individuals at each stage of study—eg numbers potentially eligible, examined for eligibility, confirmed eligible, included in the study, completing follow-up, and analysed            | 9,10                    |
|                          |     | (b) Give reasons for non-participation at each stage                                                                                                                                                         | 9,10                    |
|                          |     | (c) Consider use of a flow diagram                                                                                                                                                                           | 23                      |
| Descriptive data         | 14* | (a) Give characteristics of study participants (eg demographic, clinical, social) and information on exposures and potential confounders                                                                     | 9,10,24,25              |
|                          |     | (b) Indicate number of participants with missing data for each variable of interest                                                                                                                          | 9,10,23                 |
|                          |     | (c) Summarise follow-up time (eg, average and total amount)                                                                                                                                                  | 10,11,12,23             |
| Outcome data             | 15* | Report numbers of outcome events or summary measures over time                                                                                                                                               | 11,12,23,26,27          |
| Main results             | 16  | (a) Give unadjusted estimates and, if applicable, confounder-adjusted estimates and their precision (eg, 95% confidence interval). Make clear which confounders were adjusted for and why they were included | 11,12,23,24,25,26,27,28 |
|                          |     | (b) Report category boundaries when continuous variables were categorized                                                                                                                                    | 11,12,23,24,25,26,27,28 |
|                          |     | (c) If relevant, consider translating estimates of relative risk into absolute risk for a meaningful time period                                                                                             |                         |
| Other analyses           | 17  | Report other analyses done—eg analyses of subgroups and interactions, and sensitivity analyses                                                                                                               | 11,12,27,28             |
| <b>Discussion</b>        |     |                                                                                                                                                                                                              |                         |
| Key results              | 18  | Summarise key results with reference to study objectives                                                                                                                                                     | 12,13,14,15,16          |
| <b>Limitations</b>       |     |                                                                                                                                                                                                              |                         |
| Interpretation           | 20  | Give a cautious overall interpretation of results considering objectives, limitations, multiplicity of analyses, results from similar studies, and other relevant evidence                                   | 12,13,14,1,16,17        |
| Generalisability         | 21  | Discuss the generalisability (external validity) of the study results                                                                                                                                        | 17                      |
| <b>Other information</b> |     |                                                                                                                                                                                                              |                         |
| Funding                  | 22  | Give the source of funding and the role of the funders for the present study and, if applicable, for the original study on which the present article is based                                                | 18                      |

\*Give information separately for cases and controls in case-control studies and, if applicable, for exposed and unexposed groups in cohort and cross-sectional studies.

**Note:** An Explanation and Elaboration article discusses each checklist item and gives methodological background and published examples of transparent reporting. The STROBE checklist is best used in conjunction with this article (freely available on the Web sites of PLoS Medicine at <http://www.plosmedicine.org/>, Annals of Internal Medicine at <http://www.annals.org/>, and Epidemiology at <http://www.epidem.com/>). Information on the STROBE Initiative is available at [www.strobe-statement.org](http://www.strobe-statement.org).

# BMJ Open

## Early Chronic Kidney Disease Care Program delay kidney function deterioration in patients with Stage I–IIIa chronic kidney disease: an observational cohort study

|                                 |                                                                                                                                                                                                                                                                                                                                                                                                                                                                            |
|---------------------------------|----------------------------------------------------------------------------------------------------------------------------------------------------------------------------------------------------------------------------------------------------------------------------------------------------------------------------------------------------------------------------------------------------------------------------------------------------------------------------|
| Journal:                        | <i>BMJ Open</i>                                                                                                                                                                                                                                                                                                                                                                                                                                                            |
| Manuscript ID                   | bmjopen-2020-041210.R1                                                                                                                                                                                                                                                                                                                                                                                                                                                     |
| Article Type:                   | Original research                                                                                                                                                                                                                                                                                                                                                                                                                                                          |
| Date Submitted by the Author:   | 30-Sep-2020                                                                                                                                                                                                                                                                                                                                                                                                                                                                |
| Complete List of Authors:       | Niu, Shu-Fen; Shin Kong Wu Ho Su Memorial Hospital, Department of Nursing<br>Wu, Chung-Kuan; Shin Kong Wu Ho Su Memorial Hospital, Division of Nephrology, Department of Internal Medicine<br>Chuang, Nai-Chen; Taipei Medical University, Clinical Data Center, Office of Data Science<br>Yang, Ya-Bei; Shin Kong Wu Ho Su Memorial Hospital, Division of Cardiovascular Surgery<br>Chang, Tzu-Hao; Taipei Medical University Hospital, Clinical Big Data Research Center |
| <b>Primary Subject Heading</b>: | Renal medicine                                                                                                                                                                                                                                                                                                                                                                                                                                                             |
| Secondary Subject Heading:      | Public health                                                                                                                                                                                                                                                                                                                                                                                                                                                              |
| Keywords:                       | Chronic renal failure < NEPHROLOGY, Nephrology < INTERNAL MEDICINE, Health policy < HEALTH SERVICES ADMINISTRATION & MANAGEMENT                                                                                                                                                                                                                                                                                                                                            |
|                                 |                                                                                                                                                                                                                                                                                                                                                                                                                                                                            |

SCHOLARONE™  
Manuscripts



I, the Submitting Author has the right to grant and does grant on behalf of all authors of the Work (as defined in the below author licence), an exclusive licence and/or a non-exclusive licence for contributions from authors who are: i) UK Crown employees; ii) where BMJ has agreed a CC-BY licence shall apply, and/or iii) in accordance with the terms applicable for US Federal Government officers or employees acting as part of their official duties; on a worldwide, perpetual, irrevocable, royalty-free basis to BMJ Publishing Group Ltd ("BMJ") its licensees and where the relevant Journal is co-owned by BMJ to the co-owners of the Journal, to publish the Work in this journal and any other BMJ products and to exploit all rights, as set out in our [licence](#).

The Submitting Author accepts and understands that any supply made under these terms is made by BMJ to the Submitting Author unless you are acting as an employee on behalf of your employer or a postgraduate student of an affiliated institution which is paying any applicable article publishing charge ("APC") for Open Access articles. Where the Submitting Author wishes to make the Work available on an Open Access basis (and intends to pay the relevant APC), the terms of reuse of such Open Access shall be governed by a Creative Commons licence – details of these licences and which [Creative Commons](#) licence will apply to this Work are set out in our licence referred to above.

Other than as permitted in any relevant BMJ Author's Self Archiving Policies, I confirm this Work has not been accepted for publication elsewhere, is not being considered for publication elsewhere and does not duplicate material already published. I confirm all authors consent to publication of this Work and authorise the granting of this licence.

1  
2  
3  
4 **Early Chronic Kidney Disease Care Program delay kidney function**  
5  
6  
7 **deterioration in patients with Stage I–IIIa chronic kidney disease: an**  
8  
9  
10 **observational cohort study**  
11  
12

13 Shu-Fen Niu<sup>1,2,3</sup>, Chung-Kuan Wu<sup>4,5</sup>, Nai-Chen Chuang<sup>6</sup>, Ya-Bei Yang<sup>7</sup>, Tzu-Hao

14  
15  
16 Chang<sup>8,9</sup>  
17

18  
19 **Reprints and correspondence:**  
20

21  
22 Address to Chung-Kuan Wu, MD, PhD  
23

24  
25 Division of Nephrology, Department of Internal Medicine, Shin-Kong Wu Ho-Su  
26

27  
28 Memorial Hospital, Taipei, Taiwan  
29

30  
31 No.95, Wenchang Rd., Shilin Dist., Taipei City 11101, Taiwan  
32

33  
34 Tel: +886-2-2833-2211 ext. 2385 Fax: +886-28389491  
35

36  
37 E-mail: [m008533@ms.skh.org.tw](mailto:m008533@ms.skh.org.tw)  
38

39  
40 Or  
41

42  
43 Tzu-Hao Chang, PhD  
44

45  
46 Clinical Big Data Research Center, Taipei Medical University Hospital, Taipei,  
47

48  
49 Taiwan  
50

51  
52 No.250, Wu-Hsing st., Xinyi Dist., Taipei City 11031, Taiwan  
53

54  
55 Tel: 886-2-6638-2736 #1508 Fax: +886-2-66380233  
56

57  
58 E-mail: [kevinchang@tmu.edu.tw](mailto:kevinchang@tmu.edu.tw)  
59  
60



## ABSTRACT

**Objectives:** To investigate the effect of the Early CKD Care Program on CKD progression in patients with CKD stage I–IIIa

**Design:** Observational cohort study

**Setting:** Taipei Medical University Research Database from three affiliated hospitals.

**Participants:** Adult nonpregnant patients with CKD stage I–IIIa from Taipei Medical University Research Database between January 1, 2012 and August 31, 2017 were recruited. These patients were divided into Early CKD Care Program participants (case) and nonparticipants (control). The models were adjusted by age, sex, estimated glomerular filtration rate, and CKD stage with 1:2 propensity score to reduce bias between two groups.

**Outcome measures:** The risks of CKD stage I–IIIa progression to IIIb between Early CKD Care Program participants and nonparticipants.

**Results:** Compared with the control group, the case group demonstrated more comorbidities and higher proportions of hypertension, diabetes mellitus, gout, dyslipidemia, heart disease, and cerebrovascular disease, but had lower risk of progression to CKD stage IIIb before and (HR, 0.72; 95% CI, 0.61–0.85) and after (aHR, 0.67; 95% CI, 0.55–0.81) adjustments. Moreover, Kaplan–Meier analysis revealed the cumulative incidence of CKD stage IIIb was significantly lower in the

1  
2  
3  
4 case group than in the control group. Finally, the program was an independent  
5  
6  
7 protective factor against progression to stage IIIb, especially in patients with CKD  
8  
9  
10 stage IIIa before (HR, 0.72; 95% CI, 0.61–0.85) and after (aHR, 0.67; 95% CI, 0.55–  
11  
12  
13 0.81) adjustments.

14  
15  
16 **Conclusions:** The Early CKD Care Program is an independent protective factor  
17  
18  
19 against progression of early CKD.  
20  
21  
22

### 23 24 25 **Strengths and limitations of this study**

- 26  
27  
28 ● The study provides the information on the preventive effect of the Early CKD  
29  
30  
31 Care Program on CKD progression
- 32  
33  
34 ● The patients in our study were recruited from the greater Taipei area, which  
35  
36  
37 might not be representative of all clinical situations in Taiwan because of the  
38  
39  
40 urban–rural medical disparity
- 41  
42  
43 ● Selection bias should be considered for participants owing to their motivation  
44  
45  
46 and role of medical personnel
- 47  
48  
49 ● The clinical outcome focuses on the progression of early CKD, rather than major  
50  
51  
52 adverse cardiac events or mortality  
53  
54  
55  
56  
57  
58  
59  
60

## Introduction

Chronic kidney disease (CKD) is recognized as a global health concern<sup>1</sup> because its overall prevalence in the general population is more than 10%. CKD prevalence ranged from 11.7% to 15.1%, with stages I-V accounting for 2.8%–4.2%, 2.7%–5.3%, 6.4%–8.9%, 0.3%–0.5%, and 0.1%, respectively. Therefore, most patients with CKD are in the early stages,<sup>2</sup> in which they may have no symptoms or signs.<sup>3</sup> Such early disease stages are not easily discovered and diagnosed by primary care physicians; therefore, most patients had not consulted a nephrologist, with fewer than 6% of the patients had consulting a nephrologist even for stage III CKD.<sup>4</sup> Without appropriate response or management of early CKD, it progresses to advanced CKD and finally to end-stage renal disease (ESRD), which usually requires management with dialysis. Therefore, exponential growth in medical costs<sup>5</sup> is expected. Despite treatment, patients with ESRD have poor quality of life and high mortality risk.<sup>6</sup>

In CKD stages I-II, an optimal outcome can be achieved with adequate assessment, diagnosis, and treatment.<sup>4</sup> The US Centers for Disease Control and Prevention recommends that early CKD progression prevention should include testing for and controlling CKD risk factors as well as maintaining a healthy weight through a balanced diet and physical exercise.<sup>7</sup> Moreover, early monitoring and treatment in conjunction with lifestyle adjustments can improve the revisit rate of patients with

1  
2  
3  
4 CKD and delay renal function reduction.<sup>8</sup>  
5  
6

7 In Taiwan, more than 85,000 patients require dialysis and the related National  
8  
9  
10 Health Insurance (NHI) expenditure reached NT\$44.9 billion in 2017. To reduce  
11  
12  
13 kidney function deterioration, improve the quality of life, reduce the burden on the  
14  
15  
16 NHI program, and achieve the goal of prioritizing prevention over management,  
17  
18  
19 Taiwan's Ministry of Health and Welfare launched the Early CKD Care Program  
20  
21  
22 aimed at active management of stage I–IIIa CKD.<sup>9,10</sup> However, the effectiveness of  
23  
24  
25 intervention in delaying kidney function deterioration warrants exploration.  
26  
27

28 Therefore, this study explored the effects of an intervention-based Early CKD Care  
29  
30  
31 Program in reducing kidney function deterioration in patients with stage I–IIIa CKD.  
32  
33

## 34 **Materials and Methods**

### 35 **Data Source.**

36  
37  
38 This cohort study obtained information on patients with CKD stages I–IIIa in the  
39  
40  
41 institutional and clinical research database of Taipei Medical University (CRDB).  
42  
43  
44

45  
46 This database contains the electronic health and medical records of more than 3  
47  
48  
49 million patients from three affiliated hospitals, namely Taipei Medical University  
50  
51  
52 Hospital (TMUH), Wan Fang Hospital (WFH), and Shuang Ho Hospital (SHH). This  
53  
54  
55 study was exempted from a full review and approved by the Institutional Review  
56  
57  
58 Board of Taipei Medical University (TMU-JIRB-201803022).  
59  
60

### **Study Design and Cohort.**

Figure 1 illustrates the patient selection process for the study cohort. From the CRDB, we identified patients with CKD who had more than two medical return visits between January 1, 2012, and August 31, 2017. We enrolled those who met the following criteria of CKD stages I-IIIa: patients with normal renal function but who present signs of kidney damage such as proteinuria, hematuria, and other conditions with eGFR  $\geq 90$  mL/min/1.73 m<sup>2</sup>; patients with kidney damage with eGFR 60–89.9 mL/min/1.73 m<sup>2</sup>; and patients with eGFR 45–59.9 mL/min/1.73 m<sup>2</sup>, respectively. We excluded patients aged < 18 years and those who were pregnant. The remaining patients were divided into the case group, those who participated in the Early CKD Care Program with P4301C, P4302C, or P403603C treatment codes, and the control group, consisting of those who did not participate in the Early CKD Care Program.

### **Outcome Measures and Comorbidity.**

Major comorbidities diagnosed before the index date, according to claims data, were defined as baseline comorbidities. The comorbidities were identified using the International Classification of Diseases, Ninth Revision, Clinical Modification (ICD-9-CM) codes for hypertension, DM, gout, hyperlipidemia, heart disease, and cerebrovascular disease, as shown in Supplementary Table S1. Other baseline demographic data included age, sex, eGFR, CKD stage, and number of comorbidities.

1  
2  
3  
4 Here, the eGFR was calculated as  $186 \times \text{creatinine}^{-1.154} \times \text{age}^{-0.203} (\times 0.742$  for  
5  
6  
7 female), and the number of comorbidities was defined as the sum of the  
8  
9  
10 aforementioned comorbidities in the year prior to the enrollment date. The outcome of  
11  
12  
13 the study was patient progression to CKD stage IIIb during the study period.

### 16 **The Early CKD Care Program.**

17  
18  
19 The Bureau of NHI in Taiwan launched the Early CKD Care Program in 2011.  
20  
21  
22 Patients who participated in the program constitute this study's case group. The  
23  
24  
25 program involved (i) referral to a nephrologist and provision of medication for  
26  
27  
28 hypertension, diabetes, and hyperlipidemia to delay kidney function deterioration,  
29  
30  
31 avoid damage caused by improper medication, and prevent complications; (ii) CKD  
32  
33  
34 case managers enrolled these patients and provided nursing education and lifestyle  
35  
36  
37 consultations and routinely monitored disease progress and conducted renal function  
38  
39  
40 tests, urinalysis, and urine albumin–creatinine or protein–creatinine ratio evaluations.  
41  
42  
43 The CKD case managers informed the doctors and patients' families regarding  
44  
45  
46 medical practice and care-giving. The nursing education provided during the  
47  
48  
49 enrollment period included the following: (i) teaching the basic structure and  
50  
51  
52 functions of kidneys; (ii) introducing the common symptoms of kidney conditions as  
53  
54  
55 well as the examination values; (iii) explaining daily care and prevention of kidney  
56  
57  
58 conditions; (iv) communicating the importance of routine monitoring; (v)  
59  
60

1  
2  
3  
4 communicating the importance of consulting a doctor before using medication; (vi)  
5  
6  
7 introducing kidney needle biopsy; (vii) introducing hyperlipidemia, hypertension,  
8  
9  
10 DM, kidney conditions, and their complications; and (viii) explaining dietary  
11  
12  
13 instructions. Lifestyle recommendations included the following: smoking cessation;  
14  
15  
16 weight loss, particularly for those with BMI > 25 kg/m<sup>2</sup> or men and women with a  
17  
18  
19 waist circumference of >90 and >80 cm, respectively; daily protein intake < 1.5  
20  
21  
22 gm/kg; prevention of routine or excessive alcohol consumption; adequate exercise;  
23  
24  
25 and daily salt intake < 100 mEq. Routine physical examinations were conducted at  
26  
27  
28 least once every 6 months for CKD stages I-IIIa, and urine protein, urine creatinine,  
29  
30  
31 serum creatinine, LDL, and HbA1c were tested. The control group received routine  
32  
33  
34 care and was not enrolled or monitored by CKD case managers.  
35

### 36 37 **Statistical Analysis.**

38  
39  
40 Descriptive statistics were used to summarize the demographic data. Continuous  
41  
42  
43 variables are presented as mean and standard deviation, and categorical variables are  
44  
45  
46 presented as the number of enrollees and percentage (%). The models were adjusted  
47  
48  
49 by age, sex, estimated glomerular filtration rate, and CKD stage with 1:2 propensity  
50  
51  
52 score to reduce bias between the case group and the control group. Before PSM, we  
53  
54  
55 used Student's t test to assess age and eGFR; and the chi-squared test or Fisher's  
56  
57  
58 exact test were used for sex, CKD stage, number of comorbidities, hypertension, DM,  
59  
60

1  
2  
3  
4 gout, heart disease, hyperlipidemia, and cerebrovascular disease. After PSM, we  
5  
6  
7 evaluated the differences between matched pairs using the signed rank test for  
8  
9  
10 continuous data and McNemar's test for binary data. Cox proportional hazards  
11  
12  
13 regression was used to determine the risk factors for patients progressing to CKD  
14  
15  
16 stage IIIb by including all the candidate variables in the model. Subgroup analysis  
17  
18  
19 was used to determine the risk factors for patients progressing to CKD stage IIIb from  
20  
21  
22 baseline CKD stage IIIa or the stages before it. A two-sided statistical test at 5%  
23  
24  
25 significance was used. Analyses were performed using SAS (version 7.11; SAS  
26  
27  
28 Institute, Cary, NC, USA).

### 31 **Patient and public involvement.**

32  
33  
34 The study used de-identified data from the institutional and Taipei Medical University  
35  
36  
37 Research Database (TMURD). No patients were involved in developing the research  
38  
39  
40 question or in determining the outcome measures. Patients were not involved in  
41  
42  
43 designing the study. There are no plans to disseminate the results of this study to any  
44  
45  
46 participants.

## 49 **Results**

### 52 **Study Population Characteristics**

53  
54  
55 Table 1 presents the characteristics of the study population. Before PSM, a total of  
56  
57  
58 159,774 patients with stage I–IIIa CKD were enrolled from the participating hospitals,  
59  
60



1  
2  
3  
4 including 1,038 in the case group and 158,736 in the control group. All the variables  
5  
6  
7 were significantly different between the two groups (all  $P < 0.001$ ). Age was  
8  
9  
10 significantly higher in the case group than in the control group. By contrast, eGFR  
11  
12  
13 was significantly lower in the case group than that in the control group. The  
14  
15  
16 proportions of sex, CKD stage IIIa, hypertension, DM, gout, hyperlipidemia, heart  
17  
18  
19 disease, cerebrovascular disease, and proportion of number of comorbidity were  
20  
21  
22 significantly higher in the case group than in the control group. To reduce bias, 1:2  
23  
24  
25 PSM was used to match the age, sex, eGFR, and CKD stage. After PSM, 3,114  
26  
27  
28 patients with stage I–IIIa CKD from the participating hospitals during the study  
29  
30  
31 period were finally enrolled in the study, including 1,038 in the case group and 2,076  
32  
33  
34 in the control group. The proportion of hypertension, DM, gout, heart disease,  
35  
36  
37 hyperlipidemia, cerebrovascular disease, and proportion of number of comorbidity  
38  
39  
40 remained significantly higher in the case group than in the control group (all  $P <$   
41  
42  
43 0.001)  
44  
45

## 46 **Association of Early CKD Care Program and Risk Factors with Early CKD**

### 47 48 49 **Progression**

50  
51  
52 Table 2 lists the crude hazard ratios (HRs) and adjusted HRs (aHRs) of all variables  
53  
54  
55 for stage I–IIIa CKD that progressed to CKD stage IIIb during the study period.

56  
57  
58 Compared with patients in the control group, the HR for progression to CKD stage  
59  
60

1  
2  
3  
4 IIIb was 0.72 (95% confidence interval [CI], 0.61–0.85) for those participating in the  
5  
6  
7 Early CKD Care Program. After adjustments for the variables listed in Table 1, those  
8  
9  
10 in the control group still exhibited significant risk for progression to CKD stage IIIb  
11  
12  
13 (aHR, 0.67; 95% CI, 0.55–0.51). In addition, DM, heart disease, or cerebrovascular  
14  
15  
16 disease in patients with stage I–IIIa CKD were significant risk factors for progression  
17  
18  
19 to CKD stage IIIb. The Kaplan–Meier curves for the cumulative incidence of  
20  
21  
22 progression to CKD stage IIIb was significantly higher in patients with stage I–IIIa  
23  
24  
25 CKD who did not participate in the Early CKD Care Program (control group) than the  
26  
27  
28 curves in those who participated in the program (case group) during the follow-up  
29  
30  
31 period (log-rank test,  $P=0.0025$ ; Figure 2). The median follow-up duration was 3.0  
32  
33  
34 (1.0–4.7) years. Deterioration to CKD stage IIIb within 1, 3, and 5 years was  
35  
36  
37 respectively noted 374, 563, and 644 patients in the control group and 140, 217, and  
38  
39  
40 234 patients in the case group.

#### 41 42 43 **Association of Early CKD Care Program and risk factors between CKD stage I-** 44 45 46 **II and CKD stage IIIa with Early CKD Progression**

47  
48  
49 Of the 3114 patients with stage I–IIIa CKD in this study, 1,382 patients with CKD  
50  
51  
52 stages I–II and the remaining 1,732 patients were in stage IIIa. Table 3 lists the crude  
53  
54  
55 HRs and aHRs of all variables for the progression of CKD from stage I–IIIa to IIIb  
56  
57  
58 during the study period. In the CKD stages I–II subgroup, the Early CKD Care  
59  
60

1  
2  
3  
4 Program, the number of comorbidities, and comorbid hypertension, DM, gout, heart  
5  
6  
7 disease, hyperlipidemia, and cerebrovascular disease had no significant influence on  
8  
9  
10 the progression of CKD from stage I-II to IIIb even after adjustment for the variables.  
11  
12  
13 However, in the stage IIIa CKD subgroup, compared with those in the control group,  
14  
15  
16 the HR for progression to CKD stage IIIb in those who participated in the Early CKD  
17  
18  
19 Care Program was 0.72 (95% CI, 0.60–0.87). After adjustments for the variables  
20  
21  
22 listed in Table 1, participation in the program remained a significant protective factor  
23  
24  
25 against progression to CKD stage IIIb (aHR, 0.67; 95% CI, 0.55–0.81). In addition,  
26  
27  
28 compared with patients with stage IIIa CKD but without DM, those with DM were at  
29  
30  
31 a greater risk of progression to CKD stage IIIb (HR, 1.26; 95% CI, 1.01–1.57 and  
32  
33  
34 aHR, 1.69; 95% CI, 1.16–2.47). Compared with patients without heart disease with  
35  
36  
37 CKD stage IIIa, those with heart disease with CKD stage IIIa were at a greater risk for  
38  
39  
40 progression to CKD stage IIIb after adjustment for the variables (aHR, 1.65; 95% CI,  
41  
42  
43 1.12–2.45).

## 44 45 46 **Discussion**

47  
48  
49 In this clinical observational study, we demonstrated that patients with stage I–IIIa  
50  
51  
52 CKD who participated in the Early CKD Care Program exhibited significantly  
53  
54  
55 delayed deterioration of renal function to CKD stage IIIb compared with  
56  
57  
58 nonparticipants. Participation in the program significantly delayed the progression of  
59  
60

1  
2  
3  
4 CKD from stage IIIa to IIIb. In addition, we observed that DM, heart disease, and  
5  
6  
7 cerebrovascular disease are risk factors for deterioration of renal function among  
8  
9  
10 patients with stage I–IIIa CKD.  
11

12  
13 Compared with the control group, the case group had a higher mean age, a lower  
14  
15  
16 eGFR, a higher proportion of CKD stage IIIa, and more comorbidities before PSM. In  
17  
18  
19 real-life clinical scenarios, these disparities are reasonable. First, patients with stage I  
20  
21  
22 and II CKD typically have no noticeable symptom;<sup>4</sup> hence, they are typically not  
23  
24  
25 referred to a nephrologist. Second, patients with CKD stage IIIa are more likely to  
26  
27  
28 have clinical symptoms and therefore consult a nephrologist or seek medical attention.  
29  
30  
31 Third, patients with CKD IIIa with more comorbidities are more likely to be referred  
32  
33  
34 to a nephrologist than are those with fewer comorbidities. Fourth, older patients with  
35  
36  
37 more comorbidities are also likely to be referred to specialists. The CKD managers  
38  
39  
40 frequently encouraged those with clinical symptoms who consulted nephrologist,  
41  
42  
43 those with more comorbidities, or older patients to participate in the Early CKD Care  
44  
45  
46 Program. However, each patient's will and motivation also played a role. Therefore,  
47  
48  
49 to reduce the bias of basic characteristics between the two groups, PSM was used to  
50  
51  
52 match variables such as age, sex, eGFR, and CKD stage for further analysis.  
53  
54

55 After PSM, we observed that the case group still had more comorbidities such as  
56  
57  
58 hypertension, DM, gout, dyslipidemia, heart disease, and cerebrovascular disease than  
59  
60

1  
2  
3  
4 did the control group. Hypertension and CKD are closely interlinked. Uncontrolled  
5  
6  
7 hypertension can cause accelerate CKD progression.<sup>11</sup> Blood pressure control is  
8  
9  
10 essential to preventing CKD progression.<sup>12</sup> DM is also a major cause of CKD and a  
11  
12  
13 risk factor for CKD progression.<sup>13-15</sup> Patients with DM have a 3.8 times higher risk of  
14  
15  
16 CKD than do those without DM.<sup>15</sup> Of patients with type 2 DM, 42.3% have kidney  
17  
18  
19 injury.<sup>2</sup> Compared with CKD patients without DM, those with DM developed earlier  
20  
21  
22 and more severe CKD complications.<sup>16</sup> Intracellular hyperglycemia leads to  
23  
24  
25 endothelial dysfunction, increased oxidative stress, and protein accumulation on the  
26  
27  
28 vascular wall, which cause microvascular and macrovascular complications.<sup>17</sup>  
29  
30  
31 In addition to hypertension and DM, gout is independently associated with CKD.<sup>18</sup>  
32  
33  
34 Patients with hyperuricemia are particularly susceptible to gout development.  
35  
36  
37 Hyperuricemia is an independent risk factor for CKD, and hyperuricemia treatment  
38  
39  
40 may delay CKD progression.<sup>19, 20</sup> Chronic hyperuricemia is associated with the  
41  
42  
43 hypertension, metabolic syndrome, CKD, and cardiovascular disease.<sup>21</sup> Dyslipidemia  
44  
45  
46 is a risk factor for CKD, and CKD causes alterations in the lipoprotein profile.  
47  
48  
49 Therefore, the dyslipidemia–CKD relationship is reciprocal.<sup>22</sup> Hypertension, DM, and  
50  
51  
52 dyslipidemia are major causes of cardiovascular and cerebrovascular disease in  
53  
54  
55 patients with CKD. Treatment of hypertension, DM, and dyslipidemia in CKD  
56  
57  
58 patients can reduce the occurrence of cardiovascular events and improve associated  
59  
60

1  
2  
3  
4 outcomes.<sup>23</sup> According to the aforementioned discussion, the high proportion of heart  
5  
6  
7 and cerebrovascular disease in the case group is to be expected. In theory, CKD in  
8  
9  
10 patients with more comorbidities should more rapidly progress from stage I–IIIa to  
11  
12  
13 IIIb than do those with fewer comorbidities. However, in our study, despite having  
14  
15  
16 more comorbidities, the case group had better renal outcomes than did the control  
17  
18  
19 group. Therefore, the Early CKD Care Program was instrumental in delaying renal  
20  
21  
22 function deterioration.  
23

24  
25 In addition, the effect of the Early CKD Care Program on the progression of CKD  
26  
27  
28 from early stages to stage IIIb was analyzed. We found that participation in the  
29  
30  
31 program significantly delayed the progression of CKD from stage IIIa to IIIb, but we  
32  
33  
34 observed no significant results for the progression of CKD from stages I–II to IIIb.  
35

36  
37 Although the case group had low HRs for CKD stage IIIb compared with the control  
38  
39  
40 group, the difference remained nonsignificant. CKD progression from stage I–II to  
41  
42  
43 IIIb might require more time; hence, few patients in the control group with stage I–II  
44  
45  
46 CKD progressed to CKD stage IIIb during the follow-up period. Although some  
47  
48  
49 studies have developed clinical predication models for CKD, their study groups had  
50  
51  
52 stages III–IV CKD and ESRD was defined as the outcome.<sup>24,25</sup> No available clinical  
53  
54  
55 predication model was designed for CKD stages I–II or IIIa–IIIb. Further investigation  
56  
57  
58 employing clinical predication models for early to advanced CKD is warranted.  
59  
60

1  
2  
3  
4 In our clinical study, patients with stage I–IIIa CKD with DM, heart disease, or  
5  
6  
7 cerebrovascular disease exhibited considerable risk of progression to CKD stage IIIb.  
8

9  
10 The results are similar to those of the KEEP<sup>4</sup> and a population-level cohort study by  
11  
12  
13 Tonelli.<sup>26</sup> DM and heart disease are also significant risk factor for progression of CKD  
14  
15  
16 from stage IIIa to IIIb. Therefore, in addition to the Early CKD Care Program, the  
17  
18  
19 Diabetes Shared Care Program (DSCP) must be implemented because the DSCP  
20  
21  
22 reduces cardiovascular and cerebrovascular event and mortality risks.<sup>27</sup>  
23

24  
25 The current study had some limitations. First, the CRDB only included data from  
26  
27  
28 three educational medical institutions located in New Taipei City and Taipei City in  
29  
30  
31 Taiwan. The greater Taipei area has adequate medical resources, which might not be  
32  
33  
34 representative of all clinical situations in Taiwan because of the urban–rural medical  
35  
36  
37 disparity. Second, participation in the care program was voluntary; therefore, patients’  
38  
39  
40 motivation and the encouragement of medical personnel possibly played a role, and  
41  
42  
43 thus, selection bias should be considered. Third, the clinical outcome of our study was  
44  
45  
46 limited to the progression of early CKD, rather than being a comprehensive  
47  
48  
49 assessment of cardiovascular events and mortality. Fourth, the study did not take  
50  
51  
52 reversible acute kidney injury into account. Finally, the ethnicity of most of Taiwan’s  
53  
54  
55 population is Chinese; thus, the results might not be generalizable to populations of  
56  
57  
58 other ethnic backgrounds.  
59  
60

1  
2  
3  
4 In conclusion, this study revealed that patients with stage I–IIIa CKD who  
5  
6  
7 participated in the Early CKD Care Program benefited from a reduction in renal  
8  
9  
10 function deterioration. This program should be promoted and implemented  
11  
12  
13 particularly for those with stage IIIa CKD.  
14  
15  
16  
17  
18

### 19 **Author affiliations**

20  
21  
22 <sup>1</sup>Department of Nursing, Shin Kong Wu Ho-Su Memorial Hospital, Taipei, Taiwan  
23

24  
25 <sup>2</sup>Department of Nursing, Fu Jen Catholic University, New Taipei, Taiwan  
26

27  
28 <sup>3</sup>College of Nursing, Taipei Medical University, Taipei, Taiwan  
29

30  
31 <sup>4</sup>Division of Nephrology, Department of Internal Medicine, Shin-Kong Wu Ho-Su  
32  
33 Memorial Hospital, Taipei, Taiwan  
34

35  
36  
37 <sup>5</sup>School of Medicine, Fu-Jen Catholic University, New Taipei, Taiwan  
38

39  
40 <sup>6</sup>Clinical Data Center, Office of Data Science, Taipei Medical University, Taipei,  
41  
42  
43 Taiwan  
44

45  
46 <sup>7</sup>Division of Cardiovascular Surgery, Shin Kong Wu Ho-Su Memorial Hospital,  
47  
48  
49 Taipei, Taiwan  
50

51  
52 <sup>8</sup>Graduate Institute of Biomedical Informatics, Taipei Medical University, Taipei,  
53  
54  
55 Taiwan  
56

57  
58 <sup>9</sup>Clinical Big Data Research Center, Taipei Medical University Hospital, Taipei,  
59  
60



Taiwan

**Acknowledgments** None

**Contributors** All authors reviewed the manuscript. S.-F.N. collected and interpreted the data and wrote the manuscript. N.-C.C. and T.-H.C. ran the data and performed statistical analyses. S.-F.N. and C.-K.W. determined the concept and design of this study. Y.-B.Y. contributed to the manuscript revision. T.-H.C. and C.-K.W. helped to write the manuscript and conceived the study.

**Funding** This study was supported by grant from the Ministry of Science and Technology, Taiwan (MOST 109-2314-B-341-003-MY3).

**Competing interests** None declared

**Ethics approval** The study was approved by the Institutional Review Board of Taipei Medical University (TMU-JIRB-201803022).

**Provenance and peer review** Not commissioned; externally peer reviewed

**Data availability statement** No additional data are available.

## References

1. Bello AK, Levin A, Tonelli M *et al.* Assessment of Global Kidney Health Care Status. *JAMA* 2017; 317(18):1864-81
2. Hill NR, Fatoba ST, Oke JL *et al.* Global Prevalence of Chronic Kidney Disease - A Systematic Review and Meta-Analysis. *PLoS One* 2016;11(7):e0158765

- 1  
2  
3  
4 3. Stenvinkel P. Chronic kidney disease: a public health priority and harbinger of  
5  
6  
7 premature cardiovascular disease. *J Intern Med* 2010; 268(5):456-67  
8  
9
- 10 4. Agrawal V, Jaar BG, Frisby XY *et al.* Access to health care among adults  
11  
12 evaluated for CKD: findings from the Kidney Early Evaluation Program (KEEP).  
13  
14  
15  
16 American journal of kidney diseases : the official journal of the National Kidney  
17  
18  
19 Foundation 2012; 59(3 Suppl 2):S5-15  
20  
21
- 22 5. Mills KT, Xu Y, Zhang W *et al.* A systematic analysis of worldwide population-  
23  
24 based data on the global burden of chronic kidney disease in 2010. *Kidney Int* 2015;  
25  
26  
27  
28 88(5):950-7  
29
- 30 6. Webster AC, Nagler EV, Morton RL *et al.* Chronic Kidney Disease. *The Lancet*  
31  
32  
33  
34 2017; 389(10075):1238-52  
35  
36
- 37 7. Saran R, Robinson B, Abbott KC *et al.* US Renal Data System 2018 Annual  
38  
39  
40 Data Report: Epidemiology of Kidney Disease in the United States. American journal  
41  
42  
43 of kidney diseases : the official journal of the National Kidney Foundation 2019;  
44  
45  
46 73(3S1):A7-A8  
47  
48
- 49 8. Yamagata K, Makino H, Iseki K *et al.* Effect of Behavior Modification on  
50  
51  
52 Outcome in Early- to Moderate-Stage Chronic Kidney Disease: A Cluster-  
53  
54  
55 Randomized Trial. *PLoS One* 2016; 11(3):e0151422  
56  
57
- 58 9. Stack AG. Impact of timing of nephrology referral and pre-ESRD care on  
59  
60

1  
2  
3  
4 mortality risk among new ESRD patients in the United States. American journal of

5  
6  
7 kidney diseases : the official journal of the National Kidney Foundation 2003;

8  
9  
10 41(2):310-8

11  
12  
13 10. Lin MY, Cheng LJ, Chiu YW *et al.* Effect of national pre-ESRD care program  
14 on expenditures and mortality in incident dialysis patients: A population-based study.

15  
16  
17 PLoS One 2018; 13(6):e0198387

18  
19  
20 11. Ku E, Lee BJ, Wei J *et al.* Hypertension in CKD: Core Curriculum 2019.

21  
22  
23 American journal of kidney diseases : the official journal of the National Kidney  
24  
25  
26  
27  
28 Foundation 2019; 74(1):120-31

29  
30  
31 12. Kusaba T, Kimura K. [Management of hypertension in CKD patients]. Nihon  
32  
33  
34 Rinsho 2008; 66(9):1747-52

35  
36  
37 13. Dare AJ, Fu SH, Patra J *et al.* Renal failure deaths and their risk factors in India  
38  
39  
40 2001–13: nationally representative estimates from the Million Death Study. The

41  
42  
43 Lancet Global Health 2017; 5(1):e89-e95

44  
45  
46 14. Wen CP, Cheng TYD, Tsai MK *et al.* All-cause mortality attributable to chronic  
47  
48  
49 kidney disease: a prospective cohort study based on 462 293 adults in Taiwan. The

50  
51  
52 Lancet 2008; 371(9631):2173-82

53  
54  
55 15. McCullough PA, Steigerwalt S, Tolia K *et al.* Cardiovascular disease in chronic  
56  
57  
58 kidney disease: data from the Kidney Early Evaluation Program (KEEP). Curr Diab  
59

1  
2  
3  
4 Rep 2011; 11(1):47-55  
5  
6

7 16. Winocour PH. Diabetes and chronic kidney disease: an increasingly common  
8  
9  
10 multi-morbid disease in need of a paradigm shift in care. *Diabet Med* 2018;  
11  
12  
13 35(3):300-5  
14

15  
16 17. Peters E, van Elsas A, Heemskerk S *et al.* Alkaline phosphatase as a treatment of  
17  
18  
19 sepsis-associated acute kidney injury. *J Pharmacol Exp Ther* 2013; 344(1):2-7  
20  
21

22 18. Roughley MJ, Belcher J, Mallen CD *et al.* Gout and risk of chronic kidney  
23  
24  
25 disease and nephrolithiasis: meta-analysis of observational studies. *Arthritis Res Ther*  
26  
27  
28 2015; 17:90  
29

30  
31 19. Zhao G, Huang L, Song M *et al.* Baseline serum uric acid level as a predictor of  
32  
33  
34 cardiovascular disease related mortality and all-cause mortality: a meta-analysis of  
35  
36  
37 prospective studies. *Atherosclerosis* 2013; 231(1):61-8  
38  
39

40 20. Ishihara M, Urushido M, Hamada K *et al.* Sestrin-2 and BNIP3 regulate  
41  
42  
43 autophagy and mitophagy in renal tubular cells in acute kidney injury. *Am J Physiol*  
44  
45  
46 *Renal Physiol* 2013; 305(4):F495-509  
47

48  
49 21. Borghi C, Rosei EA, Bardin T *et al.* Serum uric acid and the risk of  
50  
51  
52 cardiovascular and renal disease. *J Hypertens* 2015; 33(9):1729-41  
53  
54

55 22. Bermudez-Lopez M, Arroyo D, Betriu A *et al.* New perspectives on CKD-  
56  
57  
58 induced dyslipidemia. *Expert opinion on therapeutic targets* 2017; 21(10):967-76  
59  
60

- 1  
2  
3  
4 23. Galvao TF, Araujo ME, Penha AP *et al.* Statins for early stage chronic kidney  
5  
6  
7 disease: an overview of reviews. *Cardiovascular & hematological disorders drug*  
8  
9  
10 targets 2014; 14(3):205-11  
11  
12  
13 24. Tangri N, Stevens LA, Griffith J *et al.* A predictive model for progression of  
14  
15  
16 chronic kidney disease to kidney failure. *JAMA* 2011; 305(15):1553-9  
17  
18  
19 25. Hasegawa T, Sakamaki K, Koiwa F *et al.* Clinical prediction models for  
20  
21  
22 progression of chronic kidney disease to end-stage kidney failure under pre-dialysis  
23  
24  
25 nephrology care: results from the Chronic Kidney Disease Japan Cohort Study. *Clin*  
26  
27  
28 *Exp Nephrol* 2019; 23(2):189-98  
29  
30  
31 26. Tonelli M, Muntner P, Lloyd A *et al.* Risk of coronary events in people with  
32  
33  
34 chronic kidney disease compared with those with diabetes: a population-level cohort  
35  
36  
37 study. *The Lancet* 2012; 380(9844):807-14  
38  
39  
40 27. Kornelius E, Chiou JY, Yang YS *et al.* The Diabetes Shared Care Program and  
41  
42  
43 Risks of Cardiovascular Events in Type 2 Diabetes. *The American journal of*  
44  
45  
46 *medicine* 2015; 128(9):977-85  
47  
48  
49  
50  
51  
52  
53  
54  
55  
56  
57  
58  
59  
60

1  
2  
3  
4  
5  
6  
7 **Figure 1. Flow of patient selection for the study cohort.**  
8  
9

10 From January 2012 to August 2017, 307,762 patients with chronic kidney disease  
11 (CKD) with more than two visits to the participating hospitals were identified in-  
12  
13 Taipei Medical University Research Database (TMURD). Adult nonpregnant patients  
14  
15 with CKD who met the specific criteria of stage I–IIIa CKD were regarded as patients  
16  
17 with early CKD. Those who participated in the Early CKD Care Program comprised  
18  
19 the case group, and those not participating in the program served as the control group.  
20  
21  
22 We conducted 1:2 propensity score matching with age, sex, estimated glomerular  
23  
24  
25  
26  
27  
28  
29  
30  
31  
32  
33  
34  
35  
36  
37  
38  
39  
40  
41  
42  
43  
44  
45  
46  
47  
48  
49  
50  
51  
52  
53  
54  
55  
56  
57  
58  
59  
60

37 **Figure 2. Cumulative incidence of progression to chronic kidney disease (CKD)**  
38  
39  
40 **stage IIIb in patients with stage I–IIIa CKD in case and control groups.**  
41  
42

43 Kaplan–Meier analysis revealed that the cumulative incidence of progression to CKD  
44  
45  
46  
47  
48  
49  
50  
51  
52  
53  
54  
55  
56  
57  
58  
59  
60

**Table 1. Baseline characteristics of enrollees**

|                    | Before propensity score matching |                    |                      |                | After propensity score matching |                    |                    |                |
|--------------------|----------------------------------|--------------------|----------------------|----------------|---------------------------------|--------------------|--------------------|----------------|
|                    | Total                            | Case group         | Control group        | <i>P</i> value | Total                           | Case group         | Control group      | <i>P</i> value |
|                    | n = 159,774<br>N (%)             | n = 1,038<br>N (%) | n = 158,736<br>N (%) |                | n = 3,114<br>N (%)              | n = 1,038<br>N (%) | n = 2,076<br>N (%) |                |
| Age                | 59.1 ± 16.1                      | 66.4 ± 12.8        | 59.1 ± 16.1          | < 0.0001       | 66.6 ± 14.4                     | 66.4 ± 12.8        | 66.7 ± 15.2        | 0.5917         |
| Sex, male          | 89933 (56.3)                     | 697 (67.2)         | 89236 (56.2)         | < 0.0001       | 2054 (66.0)                     | 697 (67.2)         | 1357 (65.7)        | 0.3358         |
| eGFR               | 79.2 ± 14.0                      | 62.2 ± 12.9        | 79.3 ± 13.9          | < 0.0001       | 62.2 ± 13.2                     | 62.2 ± 12.9        | 62.2 ± 13.3        | 0.8842         |
| CKD Stage          |                                  |                    |                      | < 0.0001       |                                 |                    |                    | 0.6009         |
| 1                  | 44066 (27.6)                     | 53 (5.1)           | 44013 (27.7)         |                | 166 (5.3)                       | 53 (5.1)           | 113 (5.4)          |                |
| 2                  | 96435 (60.4)                     | 418 (40.3)         | 96017 (60.5)         |                | 1216 (39.1)                     | 418 (40.3)         | 798 (38.4)         |                |
| 3a                 | 19273 (12.1)                     | 567 (54.6)         | 18706 (11.8)         |                | 1732 (55.6)                     | 567 (54.6)         | 1165 (56.1)        |                |
| Comorbidity number |                                  |                    |                      | < 0.0001       |                                 |                    |                    | < 0.0001       |
| 0                  | 81576 (51.1)                     | 66 (6.4)           | 81510 (51.4)         |                | 977 (31.4)                      | 66 (6.4)           | 911 (43.9)         |                |
| 1                  | 33519 (21.0)                     | 221 (21.3)         | 33298 (21.0)         |                | 698 (22.4)                      | 221 (21.3)         | 477 (23.0)         |                |
| 2                  | 25865 (16.2)                     | 303 (29.2)         | 25562 (16.1)         |                | 712 (22.9)                      | 303 (29.2)         | 409 (19.7)         |                |
| 3+                 | 18814 (11.8)                     | 448 (43.2)         | 18366 (11.6)         |                | 727 (23.4)                      | 448 (43.2)         | 279 (13.4)         |                |
| Hypertension       | 44998 (28.2)                     | 755 (72.7)         | 44243 (27.9)         | < 0.0001       | 1448 (46.5)                     | 755 (72.7)         | 693 (33.4)         | < 0.0001       |
| DM                 | 22601 (14.2)                     | 399 (38.4)         | 22202 (14.0)         | < 0.0001       | 780 (25.1)                      | 399 (38.4)         | 381 (18.4)         | < 0.0001       |
| Gout               | 7563 (4.73)                      | 257 (24.8)         | 7306 (4.6)           | < 0.0001       | 374 (12.0)                      | 257 (24.8)         | 117 (5.6)          | < 0.0001       |
| Hyperlipidemia     | 28629 (17.9)                     | 549 (52.9)         | 28080 (17.7)         | < 0.0001       | 882 (28.3)                      | 549 (52.9)         | 333 (16.0)         | < 0.0001       |

|                         |              |            |              |          |            |            |            |          |
|-------------------------|--------------|------------|--------------|----------|------------|------------|------------|----------|
| Heart disease           | 30692 (19.2) | 318 (30.6) | 30374 (19.1) | < 0.0001 | 779 (25.0) | 318 (30.6) | 461 (22.2) | < 0.0001 |
| Cerebrovascular disease | 12143 (7.6)  | 132 (12.7) | 12011 (7.6)  | < 0.0001 | 356 (11.4) | 132 (12.7) | 224 (10.8) | < 0.0001 |

eGFR, estimated glomerular filtration rate; CKD, chronic kidney disease; DM, diabetes mellitus.

Matched variables were age, sex, eGFR, and CKD stage.

For peer review only



**Table 2. Univariate and multivariate Cox regression analysis for the risk of CKD I-IIIa progression to CKD IIIb among the Early Chronic Kidney Disease Care Program and other risk factors (n = 3,114)**

| Group                   | Univariate        |          | Multivariate*     |          |
|-------------------------|-------------------|----------|-------------------|----------|
|                         | HR (95%CI)        | P value  | aHR (95%CI)       | P value  |
| Control                 | ref               |          | ref               |          |
| Case                    | 0.72 (0.61, 0.85) | < 0.0001 | 0.67 (0.55, 0.81) | < 0.0001 |
| Comorbidity number      |                   |          |                   |          |
| 0                       | ref               |          | ref               |          |
| 1                       | 0.99 (0.77, 1.29) | 0.9687   | 0.80 (0.54, 1.17) | 0.2438   |
| 2                       | 0.94 (0.73, 1.21) | 0.6374   | 0.54 (0.29, 1.02) | 0.0592   |
| 3+                      | 1.16 (0.93, 1.46) | 0.1931   | 0.46 (0.17, 1.23) | 0.1195   |
| Hypertension            |                   |          |                   |          |
| No                      | ref               |          | ref               |          |
| Yes                     | 0.98 (0.82, 1.16) | 0.7803   | 1.24 (0.85, 1.81) | 0.2654   |
| DM                      |                   |          |                   |          |
| No                      | ref               |          | ref               |          |
| Yes                     | 1.30 (1.07, 1.58) | 0.0075   | 1.72 (1.23, 2.41) | 0.0015   |
| Gout                    |                   |          |                   |          |
| No                      | ref               |          | ref               |          |
| Yes                     | 0.86 (0.67, 1.11) | 0.2577   | 1.25 (0.87, 1.77) | 0.2241   |
| Hyperlipidemia          |                   |          |                   |          |
| No                      | ref               |          | ref               |          |
| Yes                     | 0.98 (0.81, 1.19) | 0.8467   | 1.26 (0.88, 1.80) | 0.2152   |
| Heart disease           |                   |          |                   |          |
| No                      | ref               |          | ref               |          |
| Yes                     | 1.29 (1.06, 1.58) | 0.0132   | 1.70 (1.20, 2.40) | 0.0027   |
| Cerebrovascular disease |                   |          |                   |          |
| No                      | ref               |          | ref               |          |
| Yes                     | 1.36 (1.04, 1.78) | 0.0270   | 1.59 (1.12, 2.27) | 0.0104   |

DM, diabetes mellitus; aHR, adjusted hazard ratio; CI, confidence interval.

\*The multivariable model was adjusted for all variables.

**Table 3. Univariate and multivariate Cox regression analysis for the risk of baseline stage < 3a progression to stage 3b and stage 3a progression to stage 3b among the Early Chronic Kidney Disease Care Program and other risk factors**

| Group              | Baseline Stage < 3a<br>n = 1,382 |         |                   |         | Baseline Stage = 3a<br>n = 1,732 |         |                   |          |
|--------------------|----------------------------------|---------|-------------------|---------|----------------------------------|---------|-------------------|----------|
|                    | Univariate                       |         | Multivariate*     |         | Univariate                       |         | Multivariate*     |          |
|                    | HR (95%CI)                       | P value | aHR (95%CI)       | P value | HR (95%CI)                       | P value | aHR (95%CI)       | P value  |
| Control            | ref                              |         | ref               |         | ref                              |         | ref               |          |
| Case               | 0.75 (0.52, 1.08)                | 0.1244  | 0.75 (0.48, 1.17) | 0.2059  | 0.72 (0.60, 0.87)                | 0.0005  | 0.34 (0.51, 0.80) | < 0.0001 |
| Comorbidity number |                                  |         |                   |         |                                  |         |                   |          |
| 0                  | ref                              |         | ref               |         | ref                              |         | ref               |          |
| 1                  | 0.61 (0.33, 1.12)                | 0.1090  | 0.50 (0.20, 1.26) | 0.1420  | 1.09 (0.82, 1.46)                | 0.5593  | 0.87 (0.56, 1.35) | 0.5345   |
| 2                  | 0.82 (0.49, 1.38)                | 0.4528  | 0.59 (0.14, 2.48) | 0.4753  | 0.95 (0.71, 1.27)                | 0.7322  | 0.51 (0.25, 1.05) | 0.0664   |
| 3+                 | 0.99 (0.57, 1.72)                | 0.9617  | 0.64 (0.06, 6.54) | 0.7025  | 1.18 (0.91, 1.52)                | 0.2062  | 0.39 (0.13, 1.20) | 0.1013   |
| Hypertension       |                                  |         |                   |         |                                  |         |                   |          |
| No                 | ref                              |         | ref               |         | ref                              |         | ref               |          |
| Yes                | 0.93 (0.63, 1.36)                | 0.6964  | 1.10 (0.45, 2.66) | 0.7025  | 0.99 (0.81, 1.20)                | 0.8805  | 1.32 (0.86, 2.03) | 0.2019   |
| DM                 |                                  |         |                   |         |                                  |         |                   |          |
| No                 | ref                              |         | ref               |         | ref                              |         | ref               |          |
| Yes                | 1.48 (0.94, 2.34)                | 0.0932  | 1.99 (0.87, 4.54) | 0.1032  | 1.26 (1.01, 1.57)                | 0.0385  | 1.69 (1.16, 2.47) | 0.0065   |
| Gout               |                                  |         |                   |         |                                  |         |                   |          |

1  
2  
3  
4  
5  
6  
7  
8  
9  
10  
11  
12  
13  
14  
15  
16  
17  
18  
19  
20  
21  
22  
23  
24  
25  
26  
27  
28  
29  
30  
31  
32  
33  
34  
35  
36  
37  
38  
39  
40  
41  
42  
43  
44  
45  
46

|                         |                   |        |                   |        |                   |        |                   |        |
|-------------------------|-------------------|--------|-------------------|--------|-------------------|--------|-------------------|--------|
| No                      | ref               |        | ref               |        | ref               |        | ref               |        |
| Yes                     | 0.79 (0.43, 1.46) | 0.4536 | 1.05 (0.45, 2.43) | 0.9181 | 0.89 (0.67, 1.19) | 0.4329 | 1.34 (0.90, 1.99) | 0.1525 |
| Hyperlipidemia          |                   |        |                   |        |                   |        |                   |        |
| No                      | ref               |        | ref               |        | ref               |        | ref               |        |
| Yes                     | 0.73 (0.48, 1.11) | 0.1404 | 0.76 (0.34, 1.70) | 0.5014 | 1.07 (0.87, 1.33) | 0.5204 | 1.52 (0.99, 2.30) | 0.0507 |
| Heart disease           |                   |        |                   |        |                   |        |                   |        |
| No                      | ref               |        | ref               |        | ref               |        | ref               |        |
| Yes                     | 1.20 (0.74, 1.93) | 0.4599 | 1.47 (0.70, 3.12) | 0.3093 | 1.24 (0.99, 1.56) | 0.0618 | 1.65 (1.12, 2.45) | 0.0124 |
| Cerebrovascular disease |                   |        |                   |        |                   |        |                   |        |
| No                      | ref               |        | ref               |        | ref               |        | ref               |        |
| Yes                     | 1.78 (0.97, 3.28) | 0.0644 | 1.89 (0.84, 4.26) | 0.1247 | 1.25 (0.92, 1.70) | 0.1602 | 1.48 (0.99, 2.21) | 0.0576 |

DM, diabetes mellitus; HR, hazard ratio; aHR, adjusted HR.

\*The multivariable model was adjusted for all variables.

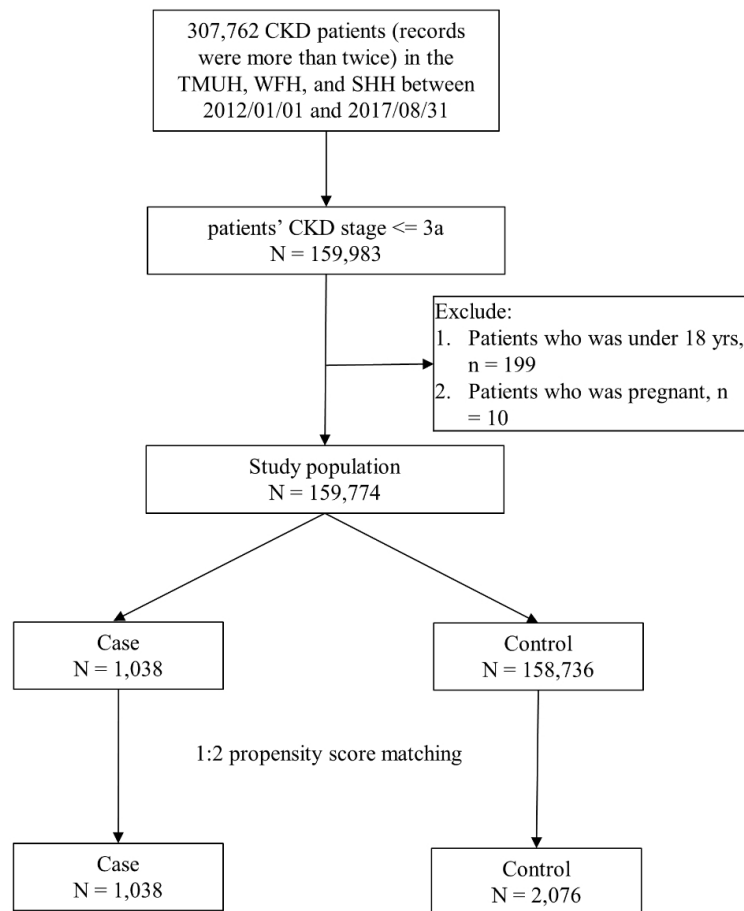

Figure 1. Flow chart of study population.

Figure 1. Flow of patient selection for the study cohort.

From January 2012 to August 2017, 307,762 patients with chronic kidney disease (CKD) with more than two visits to the participating hospitals were identified in the institutional and clinical research database of Taipei Medical University. Adult nonpregnant patients with CKD who met the specific criteria of stage I–IIIa CKD were regarded as patients with early CKD. Those who participated in the Early CKD Care Program comprised the case group, and those not participating in the program served as the control group. We conducted 1:2 propensity score matching with age, sex, estimated glomerular filtration rate, and CKD stage to reduce selection bias in the control group.

107x109mm (300 x 300 DPI)



34 Figure 2. Cumulative incidence of progression to chronic kidney disease (CKD) stage IIIb in patients with  
35 stage I–IIIa CKD in case and control groups.

36 Kaplan–Meier analysis revealed that the cumulative incidence of progression to CKD stage IIIb was  
37 significantly higher in patients with stage I–IIIa CKD who did not participate in the Early CKD Care Program  
38 compared with that of those who participated in the program, during the follow-up period (log-rank test,  $P =$   
39 0.025)

40 95x80mm (300 x 300 DPI)

1  
2  
3  
4 **Early Chronic Kidney Disease Care Program delay kidney function**  
5  
6  
7 **deterioration in patients with Stage I–IIIa chronic kidney disease: an**  
8  
9  
10 **observational cohort study**  
11  
12

13 Shu-Fen Niu, Chung-Kuan Wu, Nai-Chen Chuang, Ya-Bei Yang, Tzu-Hao Chang  
14  
15

16 **Supplementary material**  
17  
18

19 **Table S1.** International Classification of Diseases, ninth Revision, Clinical  
20  
21

22 Modification codes used to identify comorbid conditions in this study.  
23  
24  
25  
26  
27  
28  
29  
30  
31  
32  
33  
34  
35  
36  
37  
38  
39  
40  
41  
42  
43  
44  
45  
46  
47  
48  
49  
50  
51  
52  
53  
54  
55  
56  
57  
58  
59  
60

1  
2  
3  
4  
5  
6  
7  
8  
9  
10  
11  
12  
13  
14  
15  
16  
17  
18  
19  
20  
21  
22  
23  
24  
25  
26  
27  
28  
29  
30  
31  
32  
33  
34  
35  
36  
37  
38  
39  
40  
41  
42  
43  
44  
45  
46

**Table S1.** International Classification of Diseases, ninth Revision, Clinical Modification codes used to identify comorbid conditions in this study.

| Co-morbid diseases      | Corresponding ICD-9-CM codes |
|-------------------------|------------------------------|
| Hypertension            | 401.x–405.x                  |
| Diabetes mellitus       | 250.x                        |
| Gout                    | 274.x                        |
| Hyperlipidemia          | 272.x                        |
| Heart disease           | 410.x–414.x; 420.x–429.x     |
| Cerebrovascular disease | 430.x–438.x                  |

For peer review only

**STROBE 2007 (v4) Statement—Checklist of items that should be included in reports of *cohort studies***

| Section/Topic                | Item # | Recommendation                                                                                                                                                                       | Reported on page # |
|------------------------------|--------|--------------------------------------------------------------------------------------------------------------------------------------------------------------------------------------|--------------------|
| <b>Title and abstract</b>    | 1      | (a) Indicate the study's design with a commonly used term in the title or the abstract                                                                                               | 1,2,3              |
|                              |        | (b) Provide in the abstract an informative and balanced summary of what was done and what was found                                                                                  | 2,3                |
| <b>Introduction</b>          |        |                                                                                                                                                                                      |                    |
| Background/rationale         | 2      | Explain the scientific background and rationale for the investigation being reported                                                                                                 | 4,5                |
| Objectives                   | 3      | State specific objectives, including any prespecified hypotheses                                                                                                                     | 5                  |
| <b>Methods</b>               |        |                                                                                                                                                                                      |                    |
| Study design                 | 4      | Present key elements of study design early in the paper                                                                                                                              | 5,6,7              |
| Setting                      | 5      | Describe the setting, locations, and relevant dates, including periods of recruitment, exposure, follow-up, and data collection                                                      | 5,6,7              |
| Participants                 | 6      | (a) Give the eligibility criteria, and the sources and methods of selection of participants. Describe methods of follow-up                                                           | 5,6,7,8            |
|                              |        | (b) For matched studies, give matching criteria and number of exposed and unexposed                                                                                                  | Not applicable     |
| Variables                    | 7      | Clearly define all outcomes, exposures, predictors, potential confounders, and effect modifiers. Give diagnostic criteria, if applicable                                             | 6,7                |
| Data sources/<br>measurement | 8*     | For each variable of interest, give sources of data and details of methods of assessment (measurement). Describe comparability of assessment methods if there is more than one group | 5,6,7,8,9          |
| Bias                         | 9      | Describe any efforts to address potential sources of bias                                                                                                                            | 8,9,16             |
| Study size                   | 10     | Explain how the study size was arrived at                                                                                                                                            | 5,6                |
| Quantitative variables       | 11     | Explain how quantitative variables were handled in the analyses. If applicable, describe which groupings were chosen and why                                                         | 8,9                |
| Statistical methods          | 12     | (a) Describe all statistical methods, including those used to control for confounding                                                                                                | 8,9                |
|                              |        | (b) Describe any methods used to examine subgroups and interactions                                                                                                                  | 8,9                |
|                              |        | (c) Explain how missing data were addressed                                                                                                                                          | 8,9                |
|                              |        | (d) If applicable, explain how loss to follow-up was addressed                                                                                                                       | 8,9                |
|                              |        | (e) Describe any sensitivity analyses                                                                                                                                                | 8,9                |
| <b>Results</b>               |        |                                                                                                                                                                                      |                    |



|                          |     |                                                                                                                                                                                                              |                         |
|--------------------------|-----|--------------------------------------------------------------------------------------------------------------------------------------------------------------------------------------------------------------|-------------------------|
| Participants             | 13* | (a) Report numbers of individuals at each stage of study—eg numbers potentially eligible, examined for eligibility, confirmed eligible, included in the study, completing follow-up, and analysed            | 9,10                    |
|                          |     | (b) Give reasons for non-participation at each stage                                                                                                                                                         | 9,10                    |
|                          |     | (c) Consider use of a flow diagram                                                                                                                                                                           | 23                      |
| Descriptive data         | 14* | (a) Give characteristics of study participants (eg demographic, clinical, social) and information on exposures and potential confounders                                                                     | 9,10,24,25              |
|                          |     | (b) Indicate number of participants with missing data for each variable of interest                                                                                                                          | 9,10,23                 |
|                          |     | (c) Summarise follow-up time (eg, average and total amount)                                                                                                                                                  | 10,11,12,23             |
| Outcome data             | 15* | Report numbers of outcome events or summary measures over time                                                                                                                                               | 11,12,23,26,27          |
| Main results             | 16  | (a) Give unadjusted estimates and, if applicable, confounder-adjusted estimates and their precision (eg, 95% confidence interval). Make clear which confounders were adjusted for and why they were included | 11,12,23,24,25,26,27,28 |
|                          |     | (b) Report category boundaries when continuous variables were categorized                                                                                                                                    | 11,12,23,24,25,26,27,28 |
|                          |     | (c) If relevant, consider translating estimates of relative risk into absolute risk for a meaningful time period                                                                                             |                         |
| Other analyses           | 17  | Report other analyses done—eg analyses of subgroups and interactions, and sensitivity analyses                                                                                                               | 11,12,27,28             |
| <b>Discussion</b>        |     |                                                                                                                                                                                                              |                         |
| Key results              | 18  | Summarise key results with reference to study objectives                                                                                                                                                     | 12,13,14,15,16          |
| <b>Limitations</b>       |     |                                                                                                                                                                                                              |                         |
| Interpretation           | 20  | Give a cautious overall interpretation of results considering objectives, limitations, multiplicity of analyses, results from similar studies, and other relevant evidence                                   | 12,13,14,1,16,17        |
| Generalisability         | 21  | Discuss the generalisability (external validity) of the study results                                                                                                                                        | 17                      |
| <b>Other information</b> |     |                                                                                                                                                                                                              |                         |
| Funding                  | 22  | Give the source of funding and the role of the funders for the present study and, if applicable, for the original study on which the present article is based                                                | 18                      |

\*Give information separately for cases and controls in case-control studies and, if applicable, for exposed and unexposed groups in cohort and cross-sectional studies.

**Note:** An Explanation and Elaboration article discusses each checklist item and gives methodological background and published examples of transparent reporting. The STROBE checklist is best used in conjunction with this article (freely available on the Web sites of PLoS Medicine at <http://www.plosmedicine.org/>, Annals of Internal Medicine at <http://www.annals.org/>, and Epidemiology at <http://www.epidem.com/>). Information on the STROBE Initiative is available at [www.strobe-statement.org](http://www.strobe-statement.org).

# BMJ Open

## Early Chronic Kidney Disease Care Program delays kidney function deterioration in patients with Stage I–IIIa chronic kidney disease: An observational cohort study in Taiwan

|                                 |                                                                                                                                                                                                                                                                                                                                                                                                                                                                            |
|---------------------------------|----------------------------------------------------------------------------------------------------------------------------------------------------------------------------------------------------------------------------------------------------------------------------------------------------------------------------------------------------------------------------------------------------------------------------------------------------------------------------|
| Journal:                        | <i>BMJ Open</i>                                                                                                                                                                                                                                                                                                                                                                                                                                                            |
| Manuscript ID                   | bmjopen-2020-041210.R2                                                                                                                                                                                                                                                                                                                                                                                                                                                     |
| Article Type:                   | Original research                                                                                                                                                                                                                                                                                                                                                                                                                                                          |
| Date Submitted by the Author:   | 30-Dec-2020                                                                                                                                                                                                                                                                                                                                                                                                                                                                |
| Complete List of Authors:       | Niu, Shu-Fen; Shin Kong Wu Ho Su Memorial Hospital, Department of Nursing<br>Wu, Chung-Kuan; Shin Kong Wu Ho Su Memorial Hospital, Division of Nephrology, Department of Internal Medicine<br>Chuang, Nai-Chen; Taipei Medical University, Clinical Data Center, Office of Data Science<br>Yang, Ya-Bei; Shin Kong Wu Ho Su Memorial Hospital, Division of Cardiovascular Surgery<br>Chang, Tzu-Hao; Taipei Medical University Hospital, Clinical Big Data Research Center |
| <b>Primary Subject Heading</b>: | Renal medicine                                                                                                                                                                                                                                                                                                                                                                                                                                                             |
| Secondary Subject Heading:      | Public health                                                                                                                                                                                                                                                                                                                                                                                                                                                              |
| Keywords:                       | Chronic renal failure < NEPHROLOGY, Nephrology < INTERNAL MEDICINE, Health policy < HEALTH SERVICES ADMINISTRATION & MANAGEMENT                                                                                                                                                                                                                                                                                                                                            |
|                                 |                                                                                                                                                                                                                                                                                                                                                                                                                                                                            |

SCHOLARONE™  
Manuscripts

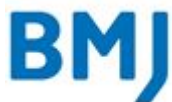

I, the Submitting Author has the right to grant and does grant on behalf of all authors of the Work (as defined in the below author licence), an exclusive licence and/or a non-exclusive licence for contributions from authors who are: i) UK Crown employees; ii) where BMJ has agreed a CC-BY licence shall apply, and/or iii) in accordance with the terms applicable for US Federal Government officers or employees acting as part of their official duties; on a worldwide, perpetual, irrevocable, royalty-free basis to BMJ Publishing Group Ltd ("BMJ") its licensees and where the relevant Journal is co-owned by BMJ to the co-owners of the Journal, to publish the Work in this journal and any other BMJ products and to exploit all rights, as set out in our [licence](#).

The Submitting Author accepts and understands that any supply made under these terms is made by BMJ to the Submitting Author unless you are acting as an employee on behalf of your employer or a postgraduate student of an affiliated institution which is paying any applicable article publishing charge ("APC") for Open Access articles. Where the Submitting Author wishes to make the Work available on an Open Access basis (and intends to pay the relevant APC), the terms of reuse of such Open Access shall be governed by a Creative Commons licence – details of these licences and which [Creative Commons](#) licence will apply to this Work are set out in our licence referred to above.

Other than as permitted in any relevant BMJ Author's Self Archiving Policies, I confirm this Work has not been accepted for publication elsewhere, is not being considered for publication elsewhere and does not duplicate material already published. I confirm all authors consent to publication of this Work and authorise the granting of this licence.

1  
2  
3  
4 **Early Chronic Kidney Disease Care Program delays kidney function**  
5  
6  
7 **deterioration in patients with Stage I–IIIa chronic kidney disease: An**  
8  
9  
10 **observational cohort study in Taiwan**  
11  
12

13 Shu-Fen Niu<sup>1,2,3</sup>, Chung-Kuan Wu<sup>4,5</sup>, Nai-Chen Chuang<sup>6</sup>, Ya-Bei Yang<sup>7</sup>, Tzu-Hao

14  
15  
16 Chang<sup>8,9</sup>  
17

18  
19 **Reprints and correspondence:**  
20

21  
22 Address to Chung-Kuan Wu, MD, PhD  
23

24  
25 Division of Nephrology, Department of Internal Medicine, Shin-Kong Wu Ho-Su  
26

27  
28 Memorial Hospital, Taipei, Taiwan  
29

30  
31 No.95, Wenchang Rd., Shilin Dist., Taipei City 11101, Taiwan  
32

33  
34 Tel: +886-2-2833-2211 ext. 2385 Fax: +886-28389491  
35

36  
37 E-mail: [m008533@ms.skh.org.tw](mailto:m008533@ms.skh.org.tw)  
38

39  
40 Or  
41

42  
43 Tzu-Hao Chang, PhD  
44

45  
46 Clinical Big Data Research Center, Taipei Medical University Hospital, Taipei,  
47

48  
49 Taiwan  
50

51  
52 No.250, Wu-Hsing st., Xinyi Dist., Taipei City 11031, Taiwan  
53

54  
55 Tel: 886-2-6638-2736 #1508 Fax: +886-2-66380233  
56

57  
58 E-mail: [kevinchang@tmu.edu.tw](mailto:kevinchang@tmu.edu.tw)  
59  
60

## ABSTRACT

**Objectives:** To investigate the effect of the Early CKD Care Program on CKD progression in patients with CKD stage I–IIIa

**Design:** Observational cohort study

**Setting:** Taipei Medical University Research Database from three affiliated hospitals.

**Participants:** Adult nonpregnant patients with CKD stage I–IIIa from Taipei Medical University Research Database between January 1, 2012 and August 31, 2017 were recruited. These patients were divided into Early CKD Care Program participants (case) and nonparticipants (control). The models were matched by age, sex, estimated glomerular filtration rate, and CKD stage with 1:2 propensity score to reduce bias between two groups.

**Outcome measures:** The risks of CKD stage I–IIIa progression to IIIb between Early CKD Care Program participants and nonparticipants.

**Results:** Compared with the control group, the case group demonstrated more comorbidities and higher proportions of hypertension, diabetes mellitus, gout, dyslipidemia, heart disease, and cerebrovascular disease, but had lower risk of progression to CKD stage IIIb before and (HR, 0.72; 95% CI, 0.61–0.85) and after (aHR, 0.67; 95% CI, 0.55–0.81) adjustments. Moreover, Kaplan–Meier analysis revealed the cumulative incidence of CKD stage IIIb was significantly lower in the

1  
2  
3  
4 case group than in the control group. Finally, the program was an independent  
5  
6  
7 protective factor against progression to stage IIIb, especially in patients with CKD  
8  
9  
10 stage IIIa before (HR, 0.72; 95% CI, 0.61–0.85) and after (aHR, 0.67; 95% CI, 0.55–  
11  
12  
13 0.81) adjustments.

14  
15  
16 **Conclusions:** The Early CKD Care Program is an independent protective factor  
17  
18  
19 against progression of early CKD.  
20  
21  
22

### 23 24 25 **Strengths and limitations of this study**

- 26  
27  
28 ● The study provides the information on the preventive effect of the Early CKD  
29  
30  
31 Care Program on CKD progression
- 32  
33  
34 ● The patients in our study were recruited from the greater Taipei area, which  
35  
36  
37 might not be representative of all clinical situations in Taiwan because of the  
38  
39  
40 urban–rural medical disparity
- 41  
42  
43 ● Selection bias should be considered for participants owing to their motivation  
44  
45  
46 and role of medical personnel
- 47  
48  
49 ● The clinical outcome focuses on the progression of early CKD, rather than major  
50  
51  
52 adverse cardiac events or mortality  
53  
54  
55  
56  
57  
58  
59  
60

## Introduction

Chronic kidney disease (CKD) is recognized as a global health concern<sup>1</sup> because its overall prevalence in the general population is more than 10%. CKD prevalence ranged from 11.7% to 15.1%, with stages I-V accounting for 2.8%–4.2%, 2.7%–5.3%, 6.4%–8.9%, 0.3%–0.5%, and 0.1%, respectively. Therefore, most patients with CKD are in the early stages,<sup>2</sup> in which they may have no symptoms or signs.<sup>3</sup> Such early disease stages are not easily discovered and diagnosed by primary care physicians; therefore, most patients had not consulted a nephrologist, with fewer than 6% of the patients had consulting a nephrologist even for stage III CKD.<sup>4</sup> Without appropriate response or management of early CKD, it progresses to advanced CKD and finally to end-stage renal disease (ESRD), which usually requires management with dialysis. Therefore, exponential growth in medical costs<sup>5</sup> is expected. Despite treatment, patients with ESRD have poor quality of life and high mortality risk.<sup>6</sup>

In CKD stages I-II, an optimal outcome can be achieved with adequate assessment, diagnosis, and treatment.<sup>4</sup> The US Centers for Disease Control and Prevention recommends that early CKD progression prevention should include testing for and controlling CKD risk factors as well as maintaining a healthy weight through a balanced diet and physical exercise.<sup>7</sup> Moreover, early monitoring and treatment in conjunction with lifestyle adjustments can improve the revisit rate of patients with

1  
2  
3  
4 CKD and delay renal function reduction.<sup>8</sup>  
5  
6

7 In Taiwan, more than 85,000 patients require dialysis and the related National  
8  
9  
10 Health Insurance (NHI) expenditure reached NT\$44.9 billion in 2017. To reduce  
11  
12  
13 kidney function deterioration, improve the quality of life, reduce the burden on the  
14  
15  
16 NHI program, and achieve the goal of prioritizing prevention over management,  
17  
18  
19 Taiwan's Ministry of Health and Welfare launched the Early CKD Care Program  
20  
21  
22 aimed at active management of stage I–IIIa CKD.<sup>9,10</sup> However, the effectiveness of  
23  
24  
25 intervention in delaying kidney function deterioration warrants exploration.  
26  
27

28 Therefore, this study explored the effects of an intervention-based Early CKD Care  
29  
30  
31 Program in reducing kidney function deterioration in patients with stage I–IIIa CKD.  
32  
33

## 34 **Materials and Methods**

### 35 **Data Source.**

36  
37  
38 This cohort study obtained information on patients with CKD stages I–IIIa in the  
39  
40  
41 institutional and clinical research database of Taipei Medical University (CRDB).  
42  
43  
44

45  
46 This database contains the electronic health and medical records of more than 3  
47  
48  
49 million patients from three affiliated hospitals, namely Taipei Medical University  
50  
51  
52 Hospital (TMUH), Wan Fang Hospital (WFH), and Shuang Ho Hospital (SHH). This  
53  
54  
55 study was exempted from a full review and approved by the Institutional Review  
56  
57  
58 Board of Taipei Medical University (TMU-JIRB-201803022).  
59  
60



### **Study Design and Cohort.**

Figure 1 illustrates the patient selection process for the study cohort. From the CRDB, we identified patients with CKD who had more than two medical return visits between January 1, 2012, and August 31, 2017. We enrolled those who met the following criteria of CKD stages I-IIIa: patients with normal renal function but who present signs of kidney damage such as proteinuria, hematuria, and other conditions with eGFR  $\geq 90$  mL/min/1.73 m<sup>2</sup>; patients with kidney damage with eGFR 60–89.9 mL/min/1.73 m<sup>2</sup>; and patients with eGFR 45–59.9 mL/min/1.73 m<sup>2</sup>, respectively. We excluded patients aged < 18 years and those who were pregnant. The remaining patients were divided into the case group, those who participated in the Early CKD Care Program with P4301C, P4302C, or P403603C treatment codes, and the control group, consisting of those who did not participate in the Early CKD Care Program.

### **Outcome Measures and Comorbidity.**

Major comorbidities diagnosed before the index date, according to claims data, were defined as baseline comorbidities. The comorbidities were identified using the International Classification of Diseases, Ninth Revision, Clinical Modification (ICD-9-CM) codes for hypertension, DM, gout, hyperlipidemia, heart disease, and cerebrovascular disease, as shown in Supplementary Table S1. Other baseline demographic data included age, sex, eGFR, CKD stage, and number of comorbidities.

1  
2  
3  
4 Here, the eGFR was calculated as  $186 \times \text{creatinine}^{-1.154} \times \text{age}^{-0.203} (\times 0.742$  for  
5  
6  
7 female), and the number of comorbidities was defined as the sum of the  
8  
9  
10 aforementioned comorbidities in the year prior to the enrollment date. The outcome of  
11  
12  
13 the study was patient progression to CKD stage IIIb during the study period.

### 16 **The Early CKD Care Program.**

17  
18  
19 The Bureau of NHI in Taiwan launched the Early CKD Care Program in 2011.  
20  
21  
22 Patients who participated in the program constitute this study's case group. The  
23  
24  
25 program involved (i) referral to a nephrologist and provision of medication for  
26  
27  
28 hypertension, diabetes, and hyperlipidemia to delay kidney function deterioration,  
29  
30  
31 avoid damage caused by improper medication, and prevent complications; (ii) CKD  
32  
33  
34 case managers enrolled these patients and provided nursing education and lifestyle  
35  
36  
37 consultations and routinely monitored disease progress and conducted renal function  
38  
39  
40 tests, urinalysis, and urine albumin–creatinine or protein–creatinine ratio evaluations.  
41  
42  
43 The CKD case managers informed the doctors and patients' families regarding  
44  
45  
46 medical practice and care-giving. The nursing education provided during the  
47  
48  
49 enrollment period included the following: (i) teaching the basic structure and  
50  
51  
52 functions of kidneys; (ii) introducing the common symptoms of kidney conditions as  
53  
54  
55 well as the examination values; (iii) explaining daily care and prevention of kidney  
56  
57  
58 conditions; (iv) communicating the importance of routine monitoring; (v)  
59  
60

1  
2  
3  
4 communicating the importance of consulting a doctor before using medication; (vi)  
5  
6  
7 introducing kidney needle biopsy; (vii) introducing hyperlipidemia, hypertension,  
8  
9  
10 DM, kidney conditions, and their complications; and (viii) explaining dietary  
11  
12  
13 instructions. Lifestyle recommendations included the following: smoking cessation;  
14  
15  
16 weight loss, particularly for those with BMI > 25 kg/m<sup>2</sup> or men and women with a  
17  
18  
19 waist circumference of >90 and >80 cm, respectively; daily protein intake < 1.5  
20  
21  
22 gm/kg; prevention of routine or excessive alcohol consumption; adequate exercise;  
23  
24  
25 and daily salt intake < 100 mEq. Routine physical examinations were conducted at  
26  
27  
28 least once every 6 months for CKD stages I-IIIa, and urine protein, urine creatinine,  
29  
30  
31 serum creatinine, LDL, and HbA1c were tested. The control group received routine  
32  
33  
34 care and was not enrolled or monitored by CKD case managers.  
35

### 36 37 **Statistical Analysis.**

38  
39  
40 Descriptive statistics were used to summarize the demographic data. Continuous  
41  
42  
43 variables are presented as mean and standard deviation, and categorical variables are  
44  
45  
46 presented as the number of enrollees and percentage (%). The models were matched  
47  
48  
49 by age, sex, estimated glomerular filtration rate, and CKD stage with 1:2 propensity  
50  
51  
52 score to reduce bias between the case group and the control group. Considering that  
53  
54  
55 the number of participants in the case group (n = 1,038) were substantially smaller  
56  
57  
58 than those in the control group (n = 158,736), we chose a greedy and nearest neighbor  
59  
60

1  
2  
3  
4 matching for propensity score matching algorithm. Before PSM, we used Student's t  
5  
6  
7 test to assess age and eGFR; and the chi-squared test or Fisher's exact test were used  
8  
9  
10 for sex, CKD stage, number of comorbidities, hypertension, DM, gout, heart disease,  
11  
12  
13 hyperlipidemia, and cerebrovascular disease. After PSM, we evaluated the differences  
14  
15  
16 between matched pairs using the signed rank test for continuous data and McNemar's  
17  
18  
19 test for binary data. Multivariable Cox proportional hazards models were matched to  
20  
21  
22 all the candidate variables, including comorbidity numbers, hypertension, DM, gout,  
23  
24  
25 hyperlipidemia, heart disease, and cerebrovascular disease to determine the risk  
26  
27  
28 factors for patients progressing to CKD stage IIIb.. Subgroup analysis was used to  
29  
30  
31 determine the risk factors for patients progressing to CKD stage IIIb from baseline  
32  
33  
34 CKD stage IIIa or the stages before it. A two-sided statistical test at 5% significance  
35  
36  
37 was used. Analyses were performed using SAS (version 7.11; SAS Institute, Cary,  
38  
39  
40 NC, USA).

#### 41 42 43 **Patient and public involvement.**

44  
45  
46 The study used de-identified data from the institutional and Taipei Medical University  
47  
48  
49 Research Database (TMURD). No patients were involved in developing the research  
50  
51  
52 question or in determining the outcome measures. Patients were not involved in  
53  
54  
55 designing the study. There are no plans to disseminate the results of this study to any  
56  
57  
58 participants.  
59  
60

## Results

### Study Population Characteristics

Table 1 presents the characteristics of the study population. Before PSM, a total of 159,774 patients with stage I–IIIa CKD were enrolled from the participating hospitals, including 1,038 in the case group and 158,736 in the control group. All the variables were significantly different between the two groups (all  $P < 0.001$ ). Age was significantly higher in the case group than in the control group. By contrast, eGFR was significantly lower in the case group than that in the control group. The proportions of sex, CKD stage IIIa, hypertension, DM, gout, hyperlipidemia, heart disease, cerebrovascular disease, and proportion of number of comorbidity were significantly higher in the case group than in the control group. To reduce bias, 1:2 PSM was used to match the age, sex, eGFR, and CKD stage. After PSM, 3,114 patients with stage I–IIIa CKD from the participating hospitals during the study period were finally enrolled in the study, including 1,038 in the case group and 2,076 in the control group. The proportion of hypertension, DM, gout, heart disease, hyperlipidemia, cerebrovascular disease, and proportion of number of comorbidities remained significantly higher in the case group than in the control group (all  $P < 0.001$ ). Distribution of eGFR amongst cases and controls during the follow-up period was shown in supplementary Table S2.

## Association of Early CKD Care Program and Risk Factors with Early CKD

### Progression

Table 2 lists the crude hazard ratios (HRs) and adjusted HRs (aHRs) of all variables for stage I–IIIa CKD that progressed to CKD stage IIIb during the study period.

Compared with patients in the control group, the HR for progression to CKD stage IIIb was 0.72 (95% confidence interval [CI], 0.61–0.85) for those participating in the Early CKD Care Program. After adjustments for the variables listed in Table 1, those in the control group still exhibited significant risk for progression to CKD stage IIIb (aHR, 0.67; 95% CI, 0.55–0.85). In addition, DM, heart disease, or cerebrovascular disease in patients with stage I–IIIa CKD were significant risk factors for progression to CKD stage IIIb. The Kaplan–Meier curves for the cumulative incidence of progression to CKD stage IIIb was significantly higher in patients with stage I–IIIa CKD who did not participate in the Early CKD Care Program (control group) than the curves in those who participated in the program (case group) during the follow-up period (log-rank test,  $P=0.0025$ ; Figure 2). The median follow-up duration was 3.0 (1.0–4.7) years. Deterioration to CKD stage IIIb within 1, 3, and 5 years was respectively noted 374, 563, and 644 patients in the control group and 140, 217, and 234 patients in the case group.

### Association of Early CKD Care Program and risk factors between CKD stage I-

## II and CKD stage IIIa with Early CKD Progression

Of the 3114 patients with stage I–IIIa CKD in this study, 1,382 patients with CKD stages I–II and the remaining 1,732 patients were in stage IIIa. Table 3 lists the crude HRs and aHRs of all variables for the progression of CKD from stage I–IIIa to IIIb during the study period. In the CKD stages I–II subgroup, the Early CKD Care Program, the number of comorbidities, and comorbid hypertension, DM, gout, heart disease, hyperlipidemia, and cerebrovascular disease had no significant influence on the progression of CKD from stage I–II to IIIb even after adjustment for the variables. However, in the stage IIIa CKD subgroup, compared with those in the control group, the HR for progression to CKD stage IIIb in those who participated in the Early CKD Care Program was 0.72 (95% CI, 0.60–0.87). After adjustments for the variables listed in Table 1, participation in the program remained a significant protective factor against progression to CKD stage IIIb (aHR, 0.67; 95% CI, 0.55–0.81). In addition, compared with patients with stage IIIa CKD but without DM, those with DM were at a greater risk of progression to CKD stage IIIb (HR, 1.26; 95% CI, 1.01–1.57 and aHR, 1.69; 95% CI, 1.16–2.47). Compared with patients without heart disease with CKD stage IIIa, those with heart disease with CKD stage IIIa were at a greater risk for progression to CKD stage IIIb after adjustment for the variables (aHR, 1.65; 95% CI, 1.12–2.45).

## Discussion

In this clinical observational study, we demonstrated that patients with stage I–IIIa CKD who participated in the Early CKD Care Program exhibited significantly delayed deterioration of renal function to CKD stage IIIb compared with nonparticipants, particularly those patients in stage IIIa. We also observed that DM, heart disease, and cerebrovascular disease are risk factors for deterioration of renal function in patients with stage I–IIIa CKD.

Compared with the control group, the case group had a higher mean age, a lower eGFR, a higher proportion of CKD stage IIIa, and more comorbidities before PSM. In the real-life clinical scenario, these disparities are reasonable. First, patients with stage I and II CKD typically have no noticeable symptom;<sup>4</sup> hence, they are usually not referred to a nephrologist. Second, patients with CKD stage IIIa are more likely to manifest clinical symptoms than patients with earlier stages of the disease and, therefore, consult a nephrologist or seek medical attention. Third, patients with CKD IIIa with more comorbidities are more likely to be referred to a nephrologist than are those with fewer comorbidities. Fourth, older patients with more comorbidities are also more likely to be referred to specialists than younger patients with same comorbidities. CKD managers frequently encourage patients with clinical symptoms and those who consulted a nephrologist, have more comorbidities, or are older to



1  
2  
3  
4 participate in the Early CKD Care Program. Therefore, PSM was used to match  
5  
6  
7 variables such as age, sex, eGFR, and CKD stage to reduce the bias of basic  
8  
9  
10 characteristics between the two groups during further analysis.  
11  
12

13 After PSM, we observed that the case group still showed more comorbidities such as  
14  
15  
16 hypertension, DM, gout, dyslipidemia, heart disease, and cerebrovascular disease,  
17  
18  
19 than the control group. Hypertension and CKD are closely interlinked. Uncontrolled  
20  
21  
22 hypertension can accelerate CKD progression;<sup>11</sup> thus, blood pressure control is  
23  
24  
25 essential to prevent CKD progression.<sup>12</sup> DM is also a major cause of CKD and a risk  
26  
27  
28 factor for CKD progression.<sup>13-15</sup> Compared with those without DM, patients with DM  
29  
30  
31 have a 3.8-fold higher risk of developing CKD.<sup>15</sup> Amongst patients with type 2 DM,  
32  
33  
34 42.3% have kidney injury.<sup>2</sup> Compared with CKD patients without DM, those with  
35  
36  
37 DM developed CKD earlier and experienced more severe CKD complications.<sup>16</sup>  
38  
39  
40 Intracellular hyperglycemia leads to endothelial dysfunction, increased oxidative  
41  
42  
43 stress, and protein accumulation on the vascular wall, which cause vascular  
44  
45  
46 complications.<sup>17</sup>  
47  
48

49 In addition to hypertension and DM, gout is independently associated with CKD.<sup>18</sup>  
50  
51  
52 Patients with hyperuricemia are particularly susceptible to gout development.  
53  
54  
55 Hyperuricemia is an independent risk factor for CKD, and hyperuricemia treatment  
56  
57  
58 may delay CKD progression.<sup>19, 20</sup> Chronic hyperuricemia is associated with  
59  
60

1  
2  
3  
4 hypertension, metabolic syndrome, CKD, and cardiovascular disease.<sup>21</sup> Dyslipidemia  
5  
6  
7 is a risk factor for CKD, and CKD causes alterations in the lipoprotein profile.  
8  
9

10 Therefore, the dyslipidemia–CKD relationship is reciprocal.<sup>22</sup> Hypertension, DM, and  
11  
12  
13 dyslipidemia are major causes of cardiovascular and cerebrovascular disease in  
14  
15  
16 patients with CKD. Treatment of hypertension, DM, and dyslipidemia in CKD  
17  
18  
19 patients can reduce the occurrence of cardiovascular events and improve associated  
20  
21  
22 outcomes.<sup>23</sup> Given the links between these diseases, the high proportion of heart and  
23  
24  
25 cerebrovascular disease observed in the case group may be expected. In theory, CKD  
26  
27  
28 in patients with many comorbidities should progress more rapidly from stage I–IIIa to  
29  
30  
31 IIIb than those with fewer comorbidities. However, in our study, despite having more  
32  
33  
34 comorbidities, the case group had better renal outcomes than the control group.  
35  
36  
37 Therefore, the Early CKD Care Program may be assumed to be instrumental in  
38  
39  
40 delaying renal function deterioration.  
41  
42

43 The effect of the Early CKD Care Program on the progression of CKD from early  
44  
45  
46 stages to stage IIIb was analyzed. We found that participation in the program  
47  
48  
49 significantly delayed the progression of CKD from stage IIIa to IIIb, however, we  
50  
51  
52 also observed no significant results for the progression of CKD from stages I–II to  
53  
54  
55 IIIb. Although the case group had low HRs for stage IIIb CKD compared with the  
56  
57  
58 control group, this difference was nonsignificant. CKD progression from stage I–II to  
59  
60

1  
2  
3  
4 IIIb may require some time, which could explain why few patients in the control  
5  
6  
7 group with stage I-II CKD progressed to stage IIIb during the follow-up period.  
8  
9

10 Although some studies have developed clinical predication models for CKD, the  
11  
12 study groups in these investigations generally had stage III- IV CKD and ESRD was  
13  
14 defined as the outcome.<sup>24,25</sup> No clinical predication model has yet been designed for  
15  
16 stages I-II or IIIa-IIIb CKD. Further investigation employing clinical predication  
17  
18 models for early-to-advanced CKD are warranted. Figure 2 illustrates that the  
19  
20 protective effect of the Early Chronic Kidney Disease Care Program was sustained  
21  
22 over the follow-up period, although the difference in cumulative incidence rate  
23  
24 between the two groups gradually increased. The decrease of the slope over time may  
25  
26 be attributed to the fact that patients who overcame the decline of their eGFR to less  
27  
28 than 45 for over 1 year had good compliance or few comorbidities.  
29  
30  
31  
32  
33  
34  
35  
36  
37  
38  
39

40 In our clinical study, patients with stage I-IIIa CKD with DM, heart disease, or  
41  
42 cerebrovascular disease exhibited considerable risk of progression to stage IIIb CKD.  
43  
44

45  
46 These results are similar to the findings of the KEEP<sup>4</sup> and a population-level cohort  
47  
48 study by Tonelli.<sup>26</sup> Besides other conditions, DM and heart disease are also significant  
49  
50 risk factors for the progression of CKD from stage IIIa to IIIb. Therefore, in addition  
51  
52 to the Early CKD Care Program, the Diabetes Shared Care Program (DSCP), which  
53  
54 has been proven to reduce cardiovascular and cerebrovascular events and mortality  
55  
56  
57  
58  
59  
60

1  
2  
3  
4 risks,<sup>27</sup> may be implemented.  
5  
6

7 The current study had some limitations that may affect the interpretation of the  
8  
9  
10 results. First, the CRDB only included data from three educational medical  
11  
12  
13 institutions located in New Taipei City and Taipei City in Taiwan. The greater Taipei  
14  
15  
16 area has adequate medical resources and, thus, may not be representative of all  
17  
18  
19 clinical situations in Taiwan on account of the urban–rural medical disparity. Second,  
20  
21  
22 our study cannot completely eliminate concerns related to selection bias because this  
23  
24  
25 phenomenon may be attributed to multiple reasons, including differential rates of  
26  
27  
28 death, and cause-specific models could feature assumptions that do not necessarily  
29  
30  
31 resolve competing risk issues. Third, the clinical outcome of our study was limited to  
32  
33  
34 the progression of early CKD; this work does not provide a comprehensive  
35  
36  
37 assessment of cardiovascular events and mortality. Fourth, the study did not take the  
38  
39  
40 potential effects of reversible kidney injury into account. Finally, the ethnicity of most  
41  
42  
43 of Taiwan’s population is Chinese; thus, the results may not be generalizable to  
44  
45  
46 populations of other ethnic backgrounds.  
47  
48

49 In conclusion, the results of this study revealed that patients with stage I–IIIa CKD  
50  
51  
52 who participated in the Early CKD Care Program benefit from a reduction in renal  
53  
54  
55 function deterioration. As such, this program should be promoted and implemented,  
56  
57  
58 especially amongst those with stage IIIa CKD. More research is needed to understand  
59  
60

1  
2  
3  
4 what type of participants in the Early Chronic Kidney Disease Care Program and  
5  
6  
7 which aspects of the Program yield the more effective results.  
8  
9  
10  
11  
12

### 13 **Author affiliations**

14  
15  
16 <sup>1</sup>Department of Nursing, Shin Kong Wu Ho-Su Memorial Hospital, Taipei, Taiwan

17  
18  
19 <sup>2</sup>Department of Nursing, Fu Jen Catholic University, New Taipei, Taiwan

20  
21  
22 <sup>3</sup>College of Nursing, Taipei Medical University, Taipei, Taiwan

23  
24  
25 <sup>4</sup>Division of Nephrology, Department of Internal Medicine, Shin-Kong Wu Ho-Su  
26  
27  
28 Memorial Hospital, Taipei, Taiwan

29  
30  
31 <sup>5</sup>School of Medicine, Fu-Jen Catholic University, New Taipei, Taiwan

32  
33  
34 <sup>6</sup>Clinical Data Center, Office of Data Science, Taipei Medical University, Taipei,  
35  
36  
37 Taiwan

38  
39  
40 <sup>7</sup>Division of Cardiovascular Surgery, Shin Kong Wu Ho-Su Memorial Hospital,  
41  
42  
43 Taipei, Taiwan

44  
45  
46 <sup>8</sup>Graduate Institute of Biomedical Informatics, Taipei Medical University, Taipei,  
47  
48  
49 Taiwan

50  
51  
52 <sup>9</sup>Clinical Big Data Research Center, Taipei Medical University Hospital, Taipei,  
53  
54  
55 Taiwan

56  
57  
58 **Acknowledgments** None  
59  
60

1  
2  
3  
4 **Contributors** All authors reviewed the manuscript. S.-F.N. collected and interpreted  
5  
6  
7 the data and wrote the manuscript. N.-C.C. and T.-H.C. ran the data and performed  
8  
9  
10 statistical analyses. S.-F.N. and C.-K.W. determined the concept and design of this  
11  
12  
13 study. Y.-B.Y. contributed to the manuscript revision. T.-H.C. and C.-K.W. helped to  
14  
15  
16 write the manuscript and conceived the study.

17  
18  
19 **Funding** This study was supported by grant from the Ministry of Science and  
20  
21  
22 Technology, Taiwan (MOST 109-2314-B-341-003-MY3).

23  
24  
25 **Competing interests** None declared

26  
27  
28 **Ethics approval** The study was approved by the Institutional Review Board of Taipei  
29  
30  
31 Medical University (TMU-JIRB-201803022).

32  
33  
34 **Provenance and peer review** Not commissioned; externally peer reviewed

35  
36  
37 **Data availability statement** No additional data are available.

## 38 39 40 41 42 **References**

- 43  
44 1. Bello AK, Levin A, Tonelli M *et al.* Assessment of Global Kidney Health Care  
45  
46 Status. JAMA 2017; 317(18):1864-81
  - 47  
48 2. Hill NR, Fatoba ST, Oke JL *et al.* Global Prevalence of Chronic Kidney Disease  
49  
50 - A Systematic Review and Meta-Analysis. PLoS One 2016;11(7):e0158765
  - 51  
52 3. Stenvinkel P. Chronic kidney disease: a public health priority and harbinger of  
53  
54 premature cardiovascular disease. J Intern Med 2010; 268(5):456-67
- 55  
56  
57  
58  
59  
60

- 1  
2  
3  
4 4. Agrawal V, Jaar BG, Frisby XY *et al.* Access to health care among adults  
5  
6  
7 evaluated for CKD: findings from the Kidney Early Evaluation Program (KEEP).  
8  
9  
10 American journal of kidney diseases : the official journal of the National Kidney  
11  
12  
13 Foundation 2012; 59(3 Suppl 2):S5-15  
14  
15
- 16 5. Mills KT, Xu Y, Zhang W *et al.* A systematic analysis of worldwide population-  
17  
18  
19 based data on the global burden of chronic kidney disease in 2010. *Kidney Int* 2015;  
20  
21  
22 88(5):950-7  
23  
24
- 25 6. Webster AC, Nagler EV, Morton RL *et al.* Chronic Kidney Disease. *The Lancet*  
26  
27  
28 2017; 389(10075):1238-52  
29  
30
- 31 7. Saran R, Robinson B, Abbott KC *et al.* US Renal Data System 2018 Annual  
32  
33  
34 Data Report: Epidemiology of Kidney Disease in the United States. *American journal*  
35  
36  
37 of kidney diseases : the official journal of the National Kidney Foundation 2019;  
38  
39  
40 73(3S1):A7-A8  
41  
42
- 43 8. Yamagata K, Makino H, Iseki K *et al.* Effect of Behavior Modification on  
44  
45  
46 Outcome in Early- to Moderate-Stage Chronic Kidney Disease: A Cluster-  
47  
48  
49 Randomized Trial. *PLoS One* 2016; 11(3):e0151422  
50  
51
- 52 9. Stack AG. Impact of timing of nephrology referral and pre-ESRD care on  
53  
54  
55 mortality risk among new ESRD patients in the United States. *American journal of*  
56  
57  
58 kidney diseases : the official journal of the National Kidney Foundation 2003;  
59  
60

1  
2  
3  
4 41(2):310-8  
5  
6

7 10. Lin MY, Cheng LJ, Chiu YW *et al.* Effect of national pre-ESRD care program  
8 on expenditures and mortality in incident dialysis patients: A population-based study.  
9  
10  
11  
12

13 PLoS One 2018; 13(6):e0198387  
14  
15

16 11. Ku E, Lee BJ, Wei J *et al.* Hypertension in CKD: Core Curriculum 2019.  
17  
18

19 American journal of kidney diseases : the official journal of the National Kidney  
20 Foundation 2019; 74(1):120-31  
21  
22

23 12. Kusaba T, Kimura K. [Management of hypertension in CKD patients]. *Nihon*  
24 *Rinsho* 2008; 66(9):1747-52  
25  
26  
27  
28  
29

30 13. Dare AJ, Fu SH, Patra J *et al.* Renal failure deaths and their risk factors in India  
31 2001–13: nationally representative estimates from the Million Death Study. *The*  
32 *Lancet Global Health* 2017; 5(1):e89-e95  
33  
34  
35  
36  
37  
38  
39

40 14. Wen CP, Cheng TYD, Tsai MK *et al.* All-cause mortality attributable to chronic  
41 kidney disease: a prospective cohort study based on 462 293 adults in Taiwan. *The*  
42 *Lancet* 2008; 371(9631):2173-82  
43  
44  
45  
46  
47  
48

49 15. McCullough PA, Steigerwalt S, Tolia K *et al.* Cardiovascular disease in chronic  
50 kidney disease: data from the Kidney Early Evaluation Program (KEEP). *Curr Diab*  
51 *Rep* 2011; 11(1):47-55  
52  
53  
54  
55  
56  
57

58 16. Winocour PH. Diabetes and chronic kidney disease: an increasingly common  
59  
60



- 1  
2  
3  
4 multi-morbid disease in need of a paradigm shift in care. *Diabet Med* 2018;  
5  
6  
7 35(3):300-5  
8  
9
- 10 17. Peters E, van Elsas A, Heemskerk S *et al.* Alkaline phosphatase as a treatment of  
11  
12 sepsis-associated acute kidney injury. *J Pharmacol Exp Ther* 2013; 344(1):2-7  
13  
14  
15
- 16 18. Roughley MJ, Belcher J, Mallen CD *et al.* Gout and risk of chronic kidney  
17  
18 disease and nephrolithiasis: meta-analysis of observational studies. *Arthritis Res Ther*  
19  
20  
21 2015; 17:90  
22  
23  
24
- 25 19. Zhao G, Huang L, Song M *et al.* Baseline serum uric acid level as a predictor of  
26  
27 cardiovascular disease related mortality and all-cause mortality: a meta-analysis of  
28  
29 prospective studies. *Atherosclerosis* 2013; 231(1):61-8  
30  
31  
32  
33
- 34 20. Ishihara M, Urushido M, Hamada K *et al.* Sestrin-2 and BNIP3 regulate  
35  
36 autophagy and mitophagy in renal tubular cells in acute kidney injury. *Am J Physiol*  
37  
38 *Renal Physiol* 2013; 305(4):F495-509  
39  
40  
41  
42
- 43 21. Borghi C, Rosei EA, Bardin T *et al.* Serum uric acid and the risk of  
44  
45 cardiovascular and renal disease. *J Hypertens* 2015; 33(9):1729-41  
46  
47  
48
- 49 22. Bermudez-Lopez M, Arroyo D, Betriu A *et al.* New perspectives on CKD-  
50  
51 induced dyslipidemia. *Expert opinion on therapeutic targets* 2017; 21(10):967-76  
52  
53  
54
- 55 23. Galvao TF, Araujo ME, Penha AP *et al.* Statins for early stage chronic kidney  
56  
57 disease: an overview of reviews. *Cardiovascular & hematological disorders drug*  
58  
59  
60

1  
2  
3  
4 targets 2014; 14(3):205-11  
5  
6

7 24. Tangri N, Stevens LA, Griffith J *et al.* A predictive model for progression of  
8  
9 chronic kidney disease to kidney failure. JAMA 2011; 305(15):1553-9  
10  
11

12  
13 25. Hasegawa T, Sakamaki K, Koiwa F *et al.* Clinical prediction models for  
14  
15 progression of chronic kidney disease to end-stage kidney failure under pre-dialysis  
16  
17 nephrology care: results from the Chronic Kidney Disease Japan Cohort Study. Clin  
18  
19 Exp Nephrol 2019; 23(2):189-98  
20  
21  
22

23  
24  
25 26. Tonelli M, Muntner P, Lloyd A *et al.* Risk of coronary events in people with  
26  
27 chronic kidney disease compared with those with diabetes: a population-level cohort  
28  
29 study. The Lancet 2012; 380(9844):807-14  
30  
31  
32

33  
34 27. Kornelius E, Chiou JY, Yang YS *et al.* The Diabetes Shared Care Program and  
35  
36 Risks of Cardiovascular Events in Type 2 Diabetes. The American journal of  
37  
38 medicine 2015; 128(9):977-85  
39  
40  
41  
42  
43  
44  
45  
46  
47  
48  
49  
50  
51  
52  
53  
54  
55  
56  
57  
58  
59  
60

1  
2  
3  
4 **Figure 1. Flow of patient selection for the study cohort.**  
5

6  
7 From January 2012 to August 2017, 307,762 patients with chronic kidney disease  
8  
9 (CKD) with more than two visits to the participating hospitals were identified in-  
10  
11 Taipei Medical University Research Database (TMURD). Adult nonpregnant patients  
12  
13 with CKD who met the specific criteria of stage I–IIIa CKD were regarded as patients  
14  
15 with early CKD. Those who participated in the Early CKD Care Program comprised  
16  
17 the case group, and those not participating in the program served as the control group.  
18  
19 We conducted 1:2 propensity score matching with age, sex, estimated glomerular  
20  
21 filtration rate, and CKD stage to reduce selection bias in the control group.  
22  
23  
24  
25  
26  
27  
28  
29  
30  
31  
32  
33

34 **Figure 2. Cumulative incidence of progression to chronic kidney disease (CKD)**  
35  
36 **stage IIIb in patients with stage I–IIIa CKD in case and control groups.**  
37

38  
39  
40 Kaplan–Meier analysis revealed that the cumulative incidence of progression to CKD  
41  
42 stage IIIb was significantly higher in patients with stage I–IIIa CKD who did not  
43  
44 participate in the Early CKD Care Program compared with that of those who  
45  
46 participated in the program, during the follow-up period (log-rank test,  $P = 0.02$ )  
47  
48  
49  
50  
51  
52  
53  
54  
55  
56  
57  
58  
59  
60

**Table 1. Baseline characteristics of enrollees**

|                    | Before propensity score matching |                    |                      |                | After propensity score matching |                    |                    |                |
|--------------------|----------------------------------|--------------------|----------------------|----------------|---------------------------------|--------------------|--------------------|----------------|
|                    | Total                            | Case group         | Control group        | <i>P</i> value | Total                           | Case group         | Control group      | <i>P</i> value |
|                    | n = 159,774<br>N (%)             | n = 1,038<br>N (%) | n = 158,736<br>N (%) |                | n = 3,114<br>N (%)              | n = 1,038<br>N (%) | n = 2,076<br>N (%) |                |
| Age                | 59.1 ± 16.1                      | 66.4 ± 12.8        | 59.1 ± 16.1          | < 0.0001       | 66.6 ± 14.4                     | 66.4 ± 12.8        | 66.7 ± 15.2        | 0.5917         |
| Sex, male          | 89933 (56.3)                     | 697 (67.2)         | 89236 (56.2)         | < 0.0001       | 2054 (66.0)                     | 697 (67.2)         | 1357 (65.7)        | 0.3358         |
| eGFR               | 79.2 ± 14.0                      | 62.2 ± 12.9        | 79.3 ± 13.9          | < 0.0001       | 62.2 ± 13.2                     | 62.2 ± 12.9        | 62.2 ± 13.3        | 0.8842         |
| CKD Stage          |                                  |                    |                      | < 0.0001       |                                 |                    |                    | 0.6009         |
| 1                  | 44066 (27.6)                     | 53 (5.1)           | 44013 (27.7)         |                | 166 (5.3)                       | 53 (5.1)           | 113 (5.4)          |                |
| 2                  | 96435 (60.4)                     | 418 (40.3)         | 96017 (60.5)         |                | 1216 (39.1)                     | 418 (40.3)         | 798 (38.4)         |                |
| 3a                 | 19273 (12.1)                     | 567 (54.6)         | 18706 (11.8)         |                | 1732 (55.6)                     | 567 (54.6)         | 1165 (56.1)        |                |
| Comorbidity number |                                  |                    |                      | < 0.0001       |                                 |                    |                    | < 0.0001       |
| 0                  | 81576 (51.1)                     | 66 (6.4)           | 81510 (51.4)         |                | 977 (31.4)                      | 66 (6.4)           | 911 (43.9)         |                |
| 1                  | 33519 (21.0)                     | 221 (21.3)         | 33298 (21.0)         |                | 698 (22.4)                      | 221 (21.3)         | 477 (23.0)         |                |
| 2                  | 25865 (16.2)                     | 303 (29.2)         | 25562 (16.1)         |                | 712 (22.9)                      | 303 (29.2)         | 409 (19.7)         |                |
| 3+                 | 18814 (11.8)                     | 448 (43.2)         | 18366 (11.6)         |                | 727 (23.4)                      | 448 (43.2)         | 279 (13.4)         |                |
| Hypertension       | 44998 (28.2)                     | 755 (72.7)         | 44243 (27.9)         | < 0.0001       | 1448 (46.5)                     | 755 (72.7)         | 693 (33.4)         | < 0.0001       |
| DM                 | 22601 (14.2)                     | 399 (38.4)         | 22202 (14.0)         | < 0.0001       | 780 (25.1)                      | 399 (38.4)         | 381 (18.4)         | < 0.0001       |
| Gout               | 7563 (4.73)                      | 257 (24.8)         | 7306 (4.6)           | < 0.0001       | 374 (12.0)                      | 257 (24.8)         | 117 (5.6)          | < 0.0001       |
| Hyperlipidemia     | 28629 (17.9)                     | 549 (52.9)         | 28080 (17.7)         | < 0.0001       | 882 (28.3)                      | 549 (52.9)         | 333 (16.0)         | < 0.0001       |

1  
2  
3  
4  
5  
6  
7  
8  
9  
10  
11  
12  
13  
14  
15  
16  
17  
18  
19  
20  
21  
22  
23  
24  
25  
26  
27  
28  
29  
30  
31  
32  
33  
34  
35  
36  
37  
38  
39  
40  
41  
42  
43  
44  
45  
46

|                         |              |            |              |          |            |            |            |          |
|-------------------------|--------------|------------|--------------|----------|------------|------------|------------|----------|
| Heart disease           | 30692 (19.2) | 318 (30.6) | 30374 (19.1) | < 0.0001 | 779 (25.0) | 318 (30.6) | 461 (22.2) | < 0.0001 |
| Cerebrovascular disease | 12143 (7.6)  | 132 (12.7) | 12011 (7.6)  | < 0.0001 | 356 (11.4) | 132 (12.7) | 224 (10.8) | < 0.0001 |

eGFR, estimated glomerular filtration rate; CKD, chronic kidney disease; DM, diabetes mellitus.

Matched variables were age, sex, eGFR, and CKD stage.

For peer review only

**Table 2. Univariable and multivariable Cox regression analysis for the risk of CKD I-IIIa progression to CKD IIIb among the Early Chronic Kidney Disease Care Program and other risk factors (n = 3,114)**

| Group                   | Univariable       |          | Multivariable*    |          |
|-------------------------|-------------------|----------|-------------------|----------|
|                         | HR (95%CI)        | P value  | aHR (95%CI)       | P value  |
| Control                 | ref               |          | ref               |          |
| Case                    | 0.72 (0.61, 0.85) | < 0.0001 | 0.67 (0.55, 0.81) | < 0.0001 |
| Comorbidity number      |                   |          |                   |          |
| 0                       | ref               |          | ref               |          |
| 1                       | 0.99 (0.77, 1.29) | 0.9687   | 0.80 (0.54, 1.17) | 0.2438   |
| 2                       | 0.94 (0.73, 1.21) | 0.6374   | 0.54 (0.29, 1.02) | 0.0592   |
| 3+                      | 1.16 (0.93, 1.46) | 0.1931   | 0.46 (0.17, 1.23) | 0.1195   |
| Hypertension            |                   |          |                   |          |
| No                      | ref               |          | ref               |          |
| Yes                     | 0.98 (0.82, 1.16) | 0.7803   | 1.24 (0.85, 1.81) | 0.2654   |
| DM                      |                   |          |                   |          |
| No                      | ref               |          | ref               |          |
| Yes                     | 1.30 (1.07, 1.58) | 0.0075   | 1.72 (1.23, 2.41) | 0.0015   |
| Gout                    |                   |          |                   |          |
| No                      | ref               |          | ref               |          |
| Yes                     | 0.86 (0.67, 1.11) | 0.2577   | 1.25 (0.87, 1.77) | 0.2241   |
| Hyperlipidemia          |                   |          |                   |          |
| No                      | ref               |          | ref               |          |
| Yes                     | 0.98 (0.81, 1.19) | 0.8467   | 1.26 (0.88, 1.80) | 0.2152   |
| Heart disease           |                   |          |                   |          |
| No                      | ref               |          | ref               |          |
| Yes                     | 1.29 (1.06, 1.58) | 0.0132   | 1.70 (1.20, 2.40) | 0.0027   |
| Cerebrovascular disease |                   |          |                   |          |
| No                      | ref               |          | ref               |          |
| Yes                     | 1.36 (1.04, 1.78) | 0.0270   | 1.59 (1.12, 2.27) | 0.0104   |

DM, diabetes mellitus; aHR, adjusted hazard ratio; CI, confidence interval.

\*The multivariable model was adjusted for all variables.

**Table 3. Univariable and multivariable Cox regression analysis for the risk of baseline stage < 3a progression to stage 3b and stage 3a progression to stage 3b among the Early Chronic Kidney Disease Care Program and other risk factors**

| Group              | Baseline Stage < 3a<br>n = 1,382 |         |                   |         | Baseline Stage = 3a<br>n = 1,732 |         |                   |          |
|--------------------|----------------------------------|---------|-------------------|---------|----------------------------------|---------|-------------------|----------|
|                    | Univariable                      |         | Multivariable*    |         | Univariable                      |         | Multivariable*    |          |
|                    | HR (95%CI)                       | P value | aHR (95%CI)       | P value | HR (95%CI)                       | P value | aHR (95%CI)       | P value  |
| Control            | ref                              |         | ref               |         | ref                              |         | ref               |          |
| Case               | 0.75 (0.52, 1.08)                | 0.1244  | 0.75 (0.48, 1.17) | 0.2059  | 0.72 (0.60, 0.87)                | 0.0005  | 0.34 (0.51, 0.80) | < 0.0001 |
| Comorbidity number |                                  |         |                   |         |                                  |         |                   |          |
| 0                  | ref                              |         | ref               |         | ref                              |         | ref               |          |
| 1                  | 0.61 (0.33, 1.12)                | 0.1090  | 0.50 (0.20, 1.26) | 0.1420  | 1.09 (0.82, 1.46)                | 0.5593  | 0.87 (0.56, 1.35) | 0.5345   |
| 2                  | 0.82 (0.49, 1.38)                | 0.4528  | 0.59 (0.14, 2.48) | 0.4753  | 0.95 (0.71, 1.27)                | 0.7322  | 0.51 (0.25, 1.05) | 0.0664   |
| 3+                 | 0.99 (0.57, 1.72)                | 0.9617  | 0.64 (0.06, 6.54) | 0.7025  | 1.18 (0.91, 1.52)                | 0.2062  | 0.39 (0.13, 1.20) | 0.1013   |
| Hypertension       |                                  |         |                   |         |                                  |         |                   |          |
| No                 | ref                              |         | ref               |         | ref                              |         | ref               |          |
| Yes                | 0.93 (0.63, 1.36)                | 0.6964  | 1.10 (0.45, 2.66) | 0.7025  | 0.99 (0.81, 1.20)                | 0.8805  | 1.32 (0.86, 2.03) | 0.2019   |
| DM                 |                                  |         |                   |         |                                  |         |                   |          |
| No                 | ref                              |         | ref               |         | ref                              |         | ref               |          |
| Yes                | 1.48 (0.94, 2.34)                | 0.0932  | 1.99 (0.87, 4.54) | 0.1032  | 1.26 (1.01, 1.57)                | 0.0385  | 1.69 (1.16, 2.47) | 0.0065   |
| Gout               |                                  |         |                   |         |                                  |         |                   |          |

|    |                         |                   |        |                   |        |                   |        |                   |        |
|----|-------------------------|-------------------|--------|-------------------|--------|-------------------|--------|-------------------|--------|
| 1  |                         |                   |        |                   |        |                   |        |                   |        |
| 2  |                         |                   |        |                   |        |                   |        |                   |        |
| 3  |                         |                   |        |                   |        |                   |        |                   |        |
| 4  |                         |                   |        |                   |        |                   |        |                   |        |
| 5  | No                      | ref               |        | ref               |        | ref               |        | ref               |        |
| 6  | Yes                     | 0.79 (0.43, 1.46) | 0.4536 | 1.05 (0.45, 2.43) | 0.9181 | 0.89 (0.67, 1.19) | 0.4329 | 1.34 (0.90, 1.99) | 0.1525 |
| 7  |                         |                   |        |                   |        |                   |        |                   |        |
| 8  | Hyperlipidemia          |                   |        |                   |        |                   |        |                   |        |
| 9  | No                      | ref               |        | ref               |        | ref               |        | ref               |        |
| 10 | Yes                     | 0.73 (0.48, 1.11) | 0.1404 | 0.76 (0.34, 1.70) | 0.5014 | 1.07 (0.87, 1.33) | 0.5204 | 1.52 (0.99, 2.30) | 0.0507 |
| 11 |                         |                   |        |                   |        |                   |        |                   |        |
| 12 | Heart disease           |                   |        |                   |        |                   |        |                   |        |
| 13 | No                      | ref               |        | ref               |        | ref               |        | ref               |        |
| 14 | Yes                     | 1.20 (0.74, 1.93) | 0.4599 | 1.47 (0.70, 3.12) | 0.3093 | 1.24 (0.99, 1.56) | 0.0618 | 1.65 (1.12, 2.45) | 0.0124 |
| 15 |                         |                   |        |                   |        |                   |        |                   |        |
| 16 | Cerebrovascular disease |                   |        |                   |        |                   |        |                   |        |
| 17 | No                      | ref               |        | ref               |        | ref               |        | ref               |        |
| 18 | Yes                     | 1.78 (0.97, 3.28) | 0.0644 | 1.89 (0.84, 4.26) | 0.1247 | 1.25 (0.92, 1.70) | 0.1602 | 1.48 (0.99, 2.21) | 0.0576 |
| 19 |                         |                   |        |                   |        |                   |        |                   |        |
| 20 |                         |                   |        |                   |        |                   |        |                   |        |

DM, diabetes mellitus; HR, hazard ratio; aHR, adjusted HR.

\*The multivariable model was adjusted for all variables.





Figure 1. Flow chart of study population.

Figure 1. Flow of patient selection for the study cohort.

From January 2012 to August 2017, 307,762 patients with chronic kidney disease (CKD) with more than two visits to the participating hospitals were identified in the institutional and clinical research database of Taipei Medical University. Adult nonpregnant patients with CKD who met the specific criteria of stage I–IIIa CKD were regarded as patients with early CKD. Those who participated in the Early CKD Care Program comprised the case group, and those not participating in the program served as the control group. We conducted 1:2 propensity score matching with age, sex, estimated glomerular filtration rate, and CKD stage to reduce selection bias in the control group.

107x109mm (300 x 300 DPI)

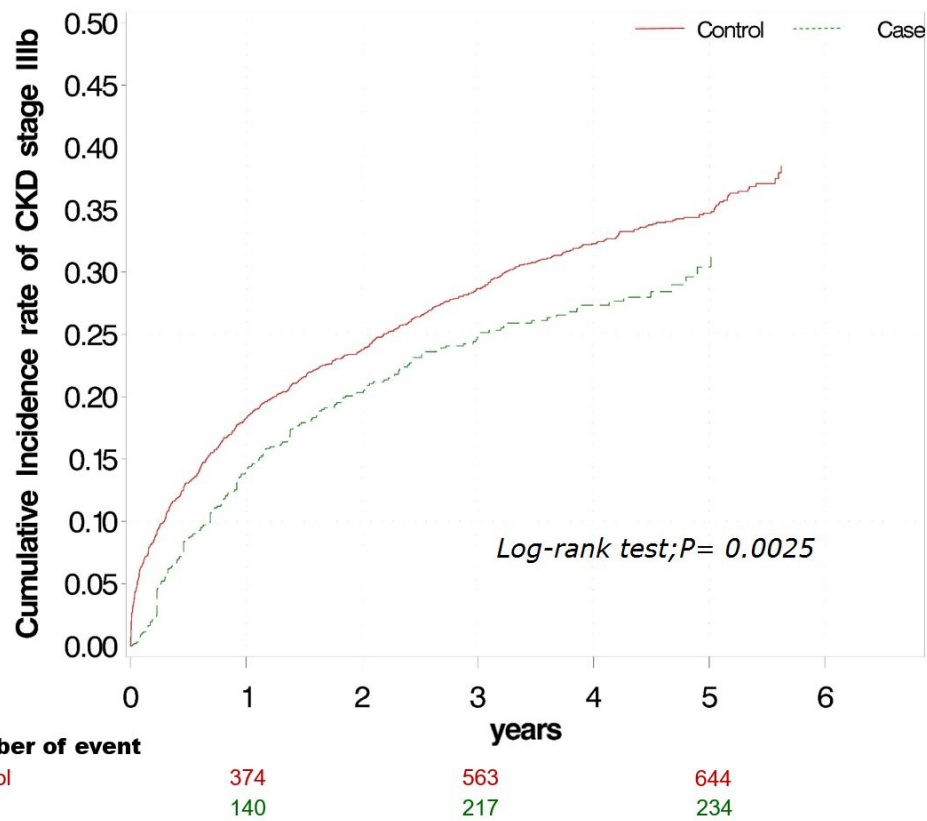

Figure 2. Cumulative incidence of progression to chronic kidney disease (CKD) stage IIIb in patients with stage I–IIIa CKD in case and control groups.

Kaplan–Meier analysis revealed that the cumulative incidence of progression to CKD stage IIIb was significantly higher in patients with stage I–IIIa CKD who did not participate in the Early CKD Care Program compared with that of those who participated in the program, during the follow-up period (log-rank test, P = 0.025)

95x80mm (300 x 300 DPI)

1  
2  
3  
4 **Early Chronic Kidney Disease Care Program delays kidney function**  
5  
6  
7 **deterioration in patients with Stage I–IIIa chronic kidney disease: An**  
8  
9  
10 **observational cohort study in Taiwan**  
11

12  
13 Shu-Fen Niu, Chung-Kuan Wu, Nai-Chen Chuang, Ya-Bei Yang, Tzu-Hao Chang  
14

15  
16 **Supplementary material**  
17

18  
19 **Table S1.** International Classification of Diseases, ninth Revision, Clinical  
20

21  
22 Modification codes used to identify comorbid conditions in this study.  
23

24  
25 **Table S2.** Distribution of eGFR amongst cases and controls during the follow-up  
26  
27  
28 period.  
29

**Table S1.** International Classification of Diseases, ninth Revision, Clinical

Modification codes used to identify comorbid conditions in this study.

| Co-morbid diseases      | Corresponding ICD-9-CM codes |
|-------------------------|------------------------------|
| Hypertension            | 401.x–405.x                  |
| Diabetes mellitus       | 250.x                        |
| Gout                    | 274.x                        |
| Hyperlipidemia          | 272.x                        |
| Heart disease           | 410.x–414.x; 420.x–429.x     |
| Cerebrovascular disease | 430.x–438.x                  |

**Table S2.** Distribution of eGFR amongst cases and controls during the follow-up period.

|                | eGFR               |             |                 |             |               |
|----------------|--------------------|-------------|-----------------|-------------|---------------|
|                | Control (n = 2076) |             | Case (n = 1038) |             | p-value       |
|                | N                  | Mean ± SD   | N               | Mean ± SD   |               |
| Follow-up time |                    |             |                 |             |               |
| Baseline       | 2076               | 62.2 ± 13.3 | 1038            | 62.2 ± 12.9 | 0.8842        |
| 1 year         | 479                | 67.0 ± 26.0 | 398             | 63.3 ± 17.9 | <b>0.0122</b> |
| 2 years        | 385                | 65.4 ± 24.5 | 239             | 65.5 ± 19.6 | 0.9406        |
| 3 years        | 301                | 63.0 ± 24.1 | 143             | 66.5 ± 19.3 | 0.0970        |
| 5 years        | 181                | 56.7 ± 20.9 | 17              | 59.1 ± 13.9 | 0.6338        |

**STROBE 2007 (v4) Statement—Checklist of items that should be included in reports of *cohort studies***

| Section/Topic                | Item # | Recommendation                                                                                                                                                                       | Reported on page # |
|------------------------------|--------|--------------------------------------------------------------------------------------------------------------------------------------------------------------------------------------|--------------------|
| Title and abstract           | 1      | (a) Indicate the study's design with a commonly used term in the title or the abstract                                                                                               | 1,2,3              |
|                              |        | (b) Provide in the abstract an informative and balanced summary of what was done and what was found                                                                                  | 2,3                |
| <b>Introduction</b>          |        |                                                                                                                                                                                      |                    |
| Background/rationale         | 2      | Explain the scientific background and rationale for the investigation being reported                                                                                                 | 4,5                |
| Objectives                   | 3      | State specific objectives, including any prespecified hypotheses                                                                                                                     | 5                  |
| <b>Methods</b>               |        |                                                                                                                                                                                      |                    |
| Study design                 | 4      | Present key elements of study design early in the paper                                                                                                                              | 5,6,7              |
| Setting                      | 5      | Describe the setting, locations, and relevant dates, including periods of recruitment, exposure, follow-up, and data collection                                                      | 5,6,7              |
| Participants                 | 6      | (a) Give the eligibility criteria, and the sources and methods of selection of participants. Describe methods of follow-up                                                           | 5,6,7,8            |
|                              |        | (b) For matched studies, give matching criteria and number of exposed and unexposed                                                                                                  | Not applicable     |
| Variables                    | 7      | Clearly define all outcomes, exposures, predictors, potential confounders, and effect modifiers. Give diagnostic criteria, if applicable                                             | 6,7                |
| Data sources/<br>measurement | 8*     | For each variable of interest, give sources of data and details of methods of assessment (measurement). Describe comparability of assessment methods if there is more than one group | 5,6,7,8,9          |
| Bias                         | 9      | Describe any efforts to address potential sources of bias                                                                                                                            | 8,9,16             |
| Study size                   | 10     | Explain how the study size was arrived at                                                                                                                                            | 5,6                |
| Quantitative variables       | 11     | Explain how quantitative variables were handled in the analyses. If applicable, describe which groupings were chosen and why                                                         | 8,9                |
| Statistical methods          | 12     | (a) Describe all statistical methods, including those used to control for confounding                                                                                                | 8,9                |
|                              |        | (b) Describe any methods used to examine subgroups and interactions                                                                                                                  | 8,9                |
|                              |        | (c) Explain how missing data were addressed                                                                                                                                          | 8,9                |
|                              |        | (d) If applicable, explain how loss to follow-up was addressed                                                                                                                       | 8,9                |
|                              |        | (e) Describe any sensitivity analyses                                                                                                                                                | 8,9                |
| <b>Results</b>               |        |                                                                                                                                                                                      |                    |

|                          |     |                                                                                                                                                                                                              |                         |
|--------------------------|-----|--------------------------------------------------------------------------------------------------------------------------------------------------------------------------------------------------------------|-------------------------|
| Participants             | 13* | (a) Report numbers of individuals at each stage of study—eg numbers potentially eligible, examined for eligibility, confirmed eligible, included in the study, completing follow-up, and analysed            | 9,10                    |
|                          |     | (b) Give reasons for non-participation at each stage                                                                                                                                                         | 9,10                    |
|                          |     | (c) Consider use of a flow diagram                                                                                                                                                                           | 23                      |
| Descriptive data         | 14* | (a) Give characteristics of study participants (eg demographic, clinical, social) and information on exposures and potential confounders                                                                     | 9,10,24,25              |
|                          |     | (b) Indicate number of participants with missing data for each variable of interest                                                                                                                          | 9,10,23                 |
|                          |     | (c) Summarise follow-up time (eg, average and total amount)                                                                                                                                                  | 10,11,12,23             |
| Outcome data             | 15* | Report numbers of outcome events or summary measures over time                                                                                                                                               | 11,12,23,26,27          |
| Main results             | 16  | (a) Give unadjusted estimates and, if applicable, confounder-adjusted estimates and their precision (eg, 95% confidence interval). Make clear which confounders were adjusted for and why they were included | 11,12,23,24,25,26,27,28 |
|                          |     | (b) Report category boundaries when continuous variables were categorized                                                                                                                                    | 11,12,23,24,25,26,27,28 |
|                          |     | (c) If relevant, consider translating estimates of relative risk into absolute risk for a meaningful time period                                                                                             |                         |
| Other analyses           | 17  | Report other analyses done—eg analyses of subgroups and interactions, and sensitivity analyses                                                                                                               | 11,12,27,28             |
| <b>Discussion</b>        |     |                                                                                                                                                                                                              |                         |
| Key results              | 18  | Summarise key results with reference to study objectives                                                                                                                                                     | 12,13,14,15,16          |
| <b>Limitations</b>       |     |                                                                                                                                                                                                              |                         |
| Interpretation           | 20  | Give a cautious overall interpretation of results considering objectives, limitations, multiplicity of analyses, results from similar studies, and other relevant evidence                                   | 12,13,14,1,16,17        |
| Generalisability         | 21  | Discuss the generalisability (external validity) of the study results                                                                                                                                        | 17                      |
| <b>Other information</b> |     |                                                                                                                                                                                                              |                         |
| Funding                  | 22  | Give the source of funding and the role of the funders for the present study and, if applicable, for the original study on which the present article is based                                                | 18                      |

\*Give information separately for cases and controls in case-control studies and, if applicable, for exposed and unexposed groups in cohort and cross-sectional studies.

**Note:** An Explanation and Elaboration article discusses each checklist item and gives methodological background and published examples of transparent reporting. The STROBE checklist is best used in conjunction with this article (freely available on the Web sites of PLoS Medicine at <http://www.plosmedicine.org/>, Annals of Internal Medicine at <http://www.annals.org/>, and Epidemiology at <http://www.epidem.com/>). Information on the STROBE Initiative is available at [www.strobe-statement.org](http://www.strobe-statement.org).
