# Supplementary material for: Early Chronic Kidney Disease Care Programme delays kidney function deterioration in patients with stage I–IIIa chronic kidney disease: an observational cohort study in Taiwan
Source: PubMed Central journal article supplement — BMJ Open. 2021 Jan 19;11(1):e041210. doi: 10.1136/bmjopen-2020-041210 (PMC7817788; doi:10.1136/bmjopen-2020-041210), 2021-01-19
Supplement: bmjopen-2020-041210supp001.pdf [file bmjopen-2020-041210supp001.pdf]

**Early Chronic Kidney Disease Care Program delays kidney function  
deterioration in patients with Stage I–IIIa chronic kidney disease: An  
observational cohort study in Taiwan**

Shu-Fen Niu, Chung-Kuan Wu, Nai-Chen Chuang, Ya-Bei Yang, Tzu-Hao Chang

**Supplementary material**

**Table S1.** International Classification of Diseases, ninth Revision, Clinical

Modification codes used to identify comorbid conditions in this study.

**Table S2.** Distribution of eGFR amongst cases and controls during the follow-up period.

**Table S1.** International Classification of Diseases, ninth Revision, Clinical

Modification codes used to identify comorbid conditions in this study.

| Co-morbid diseases      | Corresponding ICD-9-CM codes |
|-------------------------|------------------------------|
| Hypertension            | 401.x–405.x                  |
| Diabetes mellitus       | 250.x                        |
| Gout                    | 274.x                        |
| Hyperlipidemia          | 272.x                        |
| Heart disease           | 410.x–414.x; 420.x–429.x     |
| Cerebrovascular disease | 430.x–438.x                  |

**Table S2.** Distribution of eGFR amongst cases and controls during the follow-up

period.

|                | eGFR               |             |                 |             |               |
|----------------|--------------------|-------------|-----------------|-------------|---------------|
|                | Control (n = 2076) |             | Case (n = 1038) |             | p-value       |
|                | N                  | Mean ± SD   | N               | Mean ± SD   |               |
| Follow-up time |                    |             |                 |             |               |
| Baseline       | 2076               | 62.2 ± 13.3 | 1038            | 62.2 ± 12.9 | 0.8842        |
| 1 year         | 479                | 67.0 ± 26.0 | 398             | 63.3 ± 17.9 | <b>0.0122</b> |
| 2 years        | 385                | 65.4 ± 24.5 | 239             | 65.5 ± 19.6 | 0.9406        |
| 3 years        | 301                | 63.0 ± 24.1 | 143             | 66.5 ± 19.3 | 0.0970        |
| 5 years        | 181                | 56.7 ± 20.9 | 17              | 59.1 ± 13.9 | 0.6338        |
